1 **Classification:** Biological Sciences: Evolution

2

3 **The tempo of linked selection: rapid emergence of a**  
4 **heterogeneous genomic landscape during a radiation of**  
5 **monkeyflowers**

6

7 Sean Stankowski<sup>1,2,§</sup>, Madeline A. Chase<sup>1,3,§</sup>, Allison M. Fuiten<sup>1</sup>, Peter L. Ralph<sup>1</sup>, and  
8 Matthew A. Streisfeld<sup>1\*</sup>.

9

10 <sup>1</sup>Institute of Ecology and Evolution, 335 Pacific Hall 5289, University of Oregon,  
11 Eugene, OR 97405, USA

12 <sup>2</sup>Present address: Department of Animal and Plant Sciences, University of Sheffield,  
13 Sheffield S10 2TN, UK

14 <sup>3</sup>Present address: Department of Evolutionary Biology, Evolutionary Biology Centre  
15 (EBC), Uppsala University, Uppsala, Sweden

16 <sup>§</sup>These authors contributed equally to this work

17 <sup>\*</sup>Corresponding author: [mstreis@uoregon.edu](mailto:mstreis@uoregon.edu)

18

19 **ORCID ids:**

20 SS: <https://orcid.org/0000-0003-0472-9299>; MAC: <https://orcid.org/0000-0002-7916-3560>;  
21 AMF: <https://orcid.org/0000-0003-3926-5455> PLR: <https://orcid.org/0000-0002-9459-6866>;  
22 MAS: <https://orcid.org/0000-0002-2660-8642>

23

24 **Keywords:** genome assembly | lineage sorting | *Mimulus* | differentiation landscape

25

26 **Abstract**—What are the processes that shape patterns of genome-wide variation  
27 between emerging species? This question is central to our understanding of the origins of  
28 biodiversity and the fundamental principles governing molecular evolution. It is  
29 becoming clear that indirect selection on linked neutral variation (hereafter ‘linked  
30 selection’) plays a pervasive role in shaping heterogeneous patterns of genome-wide  
31 diversity and differentiation within and between species, but we do not know how these  
32 signatures of linked selection evolve over time. To fill this critical knowledge gap, we  
33 construct the first chromosome-level genome assembly for the bush monkeyflower, and  
34 use it to show that linked selection has been a primary architect of heterogeneous patterns  
35 of lineage sorting, differentiation, and nucleotide diversity across a recent radiation. By  
36 taking advantage of the range of divergence times between the different pairs of  
37 monkeyflower taxa, we also show how the signatures of linked selection evolve as  
38 populations diverge: linked selection occurring within lineages acts to conserve an  
39 ancestral pattern of diversity after a population split, while its joint action in separate  
40 lineages causes a common differentiation landscape to rapidly emerge between them.  
41 Together, our study demonstrates how pervasive linked selection shapes patterns of  
42 genome-wide variation within and between taxa, and provides critical insight into how its  
43 signature evolves during the first 1.5 million years of divergence.

44

## 45 **Significance**

46 What are the processes that shape patterns of genome-wide variation between emerging  
47 species? Because nucleotides are linked together on chromosomes, even neutral variants  
48 are impacted by selection on mutations that arise at neighboring sites. We show that this  
49 phenomenon, referred to as linked selection, was important in causing common patterns  
50 of differentiation to evolve between taxa during a radiation of monkeyflowers. This  
51 signature begins to emerge shortly after divergence begins, but it takes 1.5 million years  
52 to become pronounced. This result fills a critical gap in our knowledge about how  
53 genomes evolve, and it shows how linked selection shapes patterns of differentiation  
54 soon after a population split, which is critical to our understanding of divergence and  
55 speciation.

56

## 57 **Introduction**

58 Since the first discoveries of abundant genetic variation in nature, evolutionary  
59 geneticists have sought to understand the processes that shape patterns of polymorphism  
60 and divergence within and between species (1-6). The neutral theory explained how  
61 mutation and drift could shape genetic variation (3, 7). Despite work suggesting the  
62 importance of non-neutral forces (5, 8-10), it has remained the default assumption of  
63 most molecular genetic analyses, partly because of a lack of concrete, alternative models.  
64 However, genome-wide studies have revealed heterogeneous patterns of genetic variation  
65 that are inconsistent with purely neutral forces (11-14). These genomic ‘landscapes’ can  
66 be important confounders for work in other fields, such as speciation research (15-17),  
67 and they provide intriguing clues in their own right into the ongoing evolutionary forces  
68 shaping our own genomes.

69 Heterogeneous genomic landscapes are increasingly understood to be formed due  
70 to the indirect effects of selection on linked neutral variation (hereafter, linked selection)  
71 (13). For example, variable patterns of genetic diversity ( $\pi$ ) have now been observed  
72 across the genomes of a diverse range of plants and animals, and appear to have been  
73 shaped by variation in the intensity of linked selection across the genome (14, 18). This  
74 occurs because natural selection reduces the amount of genetic variation available to  
75 future generations at linked sites, similar to a reduction in local effective population size  
76 ( $N_e$ ) (19-23). It is important to note that all forms of selection, whether acting on  
77 deleterious or beneficial mutations or on epistatic interactions, have linked effects. In  
78 theoretical models of recurrent linked selection, its local intensity is determined by the  
79 density of targets of selection relative to the recombination rate, such that larger  
80 reductions in diversity occur in genomic regions with more frequent selection and less  
81 recombination (19-22).

82 Compared to patterns of within-species diversity, we know relatively little about  
83 how linked selection shapes patterns of genome-wide differentiation between emerging  
84 species (15). Although rates of differentiation and lineage sorting should be accelerated in  
85 genomic regions that have experienced long-term reductions in diversity (24-26), we do  
86 not know how long it takes for linked selection to generate heterogeneous patterns of  
87 between-species variation (17). Unlike patterns of diversity ( $\pi$ ), which are inherited from  
88 an ancestral population and maintained in diverging taxa by ongoing linked selection, a  
89 heterogeneous pattern of differentiation ( $F_{ST}$ ) should emerge gradually owing to the  
90 accumulating effects of lineage-specific linked selection following a population split.

91 However, the temporal dynamics of genomic landscape evolution, which have been  
92 outlined in a verbal model by Burri (16), have never been explicitly tested. Therefore,  
93 empirical studies are needed to fill this critical gap in our knowledge of the processes that  
94 shape patterns of genome-wide variation between emerging species.

95 In this paper, we study the temporal signatures of linked selection using taxa from  
96 the bush monkeyflower radiation (Figure 1). This recent radiation of perennial shrubs is  
97 distributed throughout California and consists of seven subspecies of *Mimulus*  
98 *aurantiacus*, one with two ecotypes (27). Together with their sister species *M.*  
99 *clevelandii*, they span a variety of divergence times, ranging from locally adapted  
100 ecotypes to species separated by ~1.5 million years (28). The plants inhabit multiple  
101 environments, including temperate coastal regions, mountain ranges, semi-arid habitats,  
102 and offshore islands (29). Most of the taxa are geographically isolated from one another,  
103 though some have parapatric distributions and hybridize in narrow regions where their  
104 distributions overlap (30-36). Recent phylogenetic studies have confirmed the monophyly  
105 of the radiation and revealed the basic relationships among its taxa (27, 33), making it an  
106 excellent system to study how the signatures of linked selection evolve over time.

107 Using whole-genome sequencing and the first chromosome-level reference  
108 assembly for the bush monkeyflower, we reveal heterogeneous patterns of lineage  
109 sorting, diversity, and differentiation that have been shaped by variation in the intensity  
110 of linked selection acting across the genome. By using the different taxon pairs as points  
111 along a divergence continuum, we then show how these signatures of linked selection  
112 evolve over the first 1.5 million years of divergence. These results have important  
113 implications for our understanding of the origins of biodiversity, speciation, and the basic  
114 principles governing molecular evolution.

115

## 116 **Results and Discussion**

### 117 *A chromosome-level genome assembly, map, and annotation for the bush monkeyflower*

118 To facilitate the analysis of genome-wide variation in this group, we constructed  
119 the first chromosome-level reference genome for the bush monkeyflower using a  
120 combination of long-read Single Molecule Real Time (SMRT) sequencing reads  
121 (PacBio), overlapping and mate-pair short-reads (Illumina), and a high-density genetic  
122 map (7,589 segregating markers across 10 linkage groups; Fig. S1; Table S1). Contig  
123 building and scaffolding yielded 1,547 scaffolds, with an N50 size of 1,578 kbp, and a  
124 total length of 207 Mbp. The high-density map allowed us to anchor and orient 94% of  
125 the assembled genome onto 10 linkage groups, which is the number of chromosomes  
126 inferred from karyotypic analyses in all subspecies of *M. aurantiacus* and *M. clevelandii*  
127 (37). Analysis of assembly completeness based on conserved gene space (38) revealed  
128 that 93% of 1440 universal single copy orthologous genes were completely assembled  
129 (Table S2). Subsequent annotation yielded 23,018 predicted genes.

130

### 131 *Variation in the extent of lineage sorting across the genome*

132 As a first step toward understanding the processes that have shaped patterns of  
133 genome-wide variation during this radiation, we inferred phylogenetic relationships  
134 among its taxa. Rapid diversification is a hallmark of radiations and can result in  
135 extensive phylogenetic discordance between genomic regions due to incomplete lineage  
136 sorting (ILS) (39-42). To do this, we sequenced 37 whole genomes from the seven

137 subspecies and two ecotypes of *Mimulus aurantiacus* ( $n = 4-5$  per taxon) and its sister  
 138 species *M. clevelandii* ( $n = 3$ ) (Fig. S2; Table S3). Close sequence similarity allowed us  
 139 to align reads from all samples to the reference assembly with high confidence (average  
 140 91.7% reads aligned; Table S3). After mapping, we identified 13.2 million variable sites  
 141 that were used in subsequent analyses (average sequencing depth of 21x per individual,  
 142 Table S3). Relationships were inferred among the nine taxa using maximum-likelihood  
 143 (ML) phylogenetic analysis (43) based on three different datasets: whole-genome  
 144 concatenation and 500 kb and 100 kb non-overlapping genomic windows.  
 145

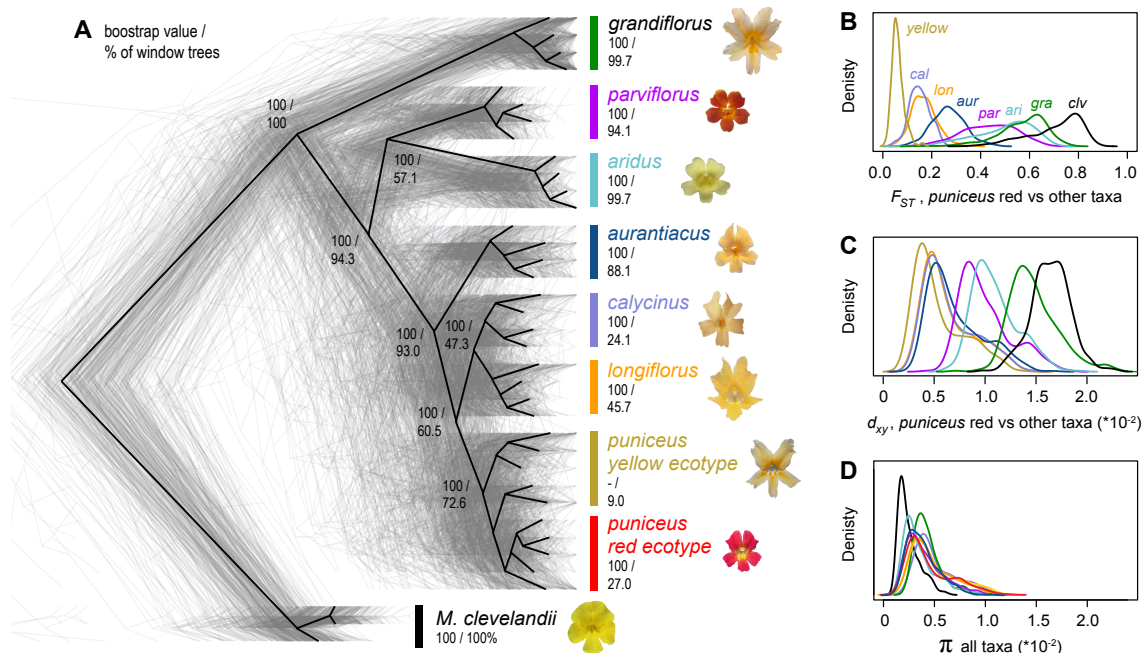

146  
 147 **Figure 1. Evolutionary relationships and patterns of genome-wide variation across the**  
 148 **radiation.** A) The black tree was constructed from a concatenated alignment of genome-wide  
 149 SNPs and is rooted using *M. clevelandii*. The 387 gray trees were constructed from 500 kb  
 150 genomic windows. The first number associated with each node or taxon is the bootstrap support  
 151 for that clade in the whole genome tree, and the second number is the percentage of window-  
 152 based trees in which that clade is present. B) Levels of differentiation ( $F_{ST}$ ), C) divergence ( $d_{xy}$ ),  
 153 and D) diversity ( $\pi$ ) within and among taxa based on the same 500 kb windows. For simplicity,  
 154  $F_{ST}$  and  $d_{xy}$  are shown only for comparisons with the red ecotype of subspecies *puniceus*.  
 155

156 The tree topology obtained from the whole genome (concatenated) dataset (Fig. 1)  
 157 confirmed the same phylogenetic relationships as previous analyses based on reduced-  
 158 representation sequencing and five methods of phylogenetic reconstruction (27, 33), and  
 159 were supported by patterns of clustering from principal components analysis (Fig. S3).  
 160 All seven subspecies formed monophyletic groups with 100% bootstrap support.  
 161 Relationships within subspecies *puniceus* were more complex, as the red ecotype formed  
 162 a monophyletic sub-clade within the paraphyletic yellow ecotype, reflecting the recent  
 163 origin of red flowers from a yellow-flowered ancestor (33).

164 Although the whole genome phylogeny provides a well-supported summary of the  
165 relationships among the taxa, window-based analyses revealed extensive phylogenetic  
166 discordance at a finer genomic scale (Fig 1A). Despite four of the subspecies forming  
167 separate monophyletic groups in nearly all of the 387 window-based trees (500 kb scale;  
168 *grandiflorus* 99.7%, *aridus* 99.7%, *parviflorus* 94.1%, and *aurantiacus* 88.1%), only 22  
169 (6%) trees showed the same taxon branching order as the whole-genome tree. While  
170 some of this discordance could be generated by gene flow after divergence (33, 42, 44,  
171 45), our data indicate that the majority is due to incomplete lineage sorting (ILS).  
172 Specifically, higher levels of discordance were observed at nodes that were separated by  
173 shorter internode lengths ( $r^2 = 0.94$ ,  $p < 0.001$ ; Fig. S4). For example, even though  
174 subspecies *puniceus* was monophyletic in the majority of trees (72.6%), individuals from  
175 the red and yellow ecotypes only formed monophyletic groups in 27% and 9% of the  
176 trees, respectively. Similarly, the closely related subspecies *longiflorus* and *calycinus*  
177 were monophyletic in fewer trees than the other subspecies (45.7% and 24.1%,  
178 respectively). Thus, it appears that ILS is the primary source of phylogenetic conflict,  
179 especially near rapid divergence events, as predicted by theory (41, 46) and shown in  
180 other diverse radiations (42, 47).

181 Next, we examined how the pattern of lineage sorting varied across the bush  
182 monkeyflower genome. Tree discordance resulting from the stochastic effects of neutral  
183 demography should be distributed uniformly across the genome (39). To test this  
184 prediction, we computed the correlation between the distance matrix generated from each  
185 window-based tree and the whole-genome tree, with a stronger relationship indicating  
186 that they are more similar (i.e., less ILS). Plotting this tree concordance score across the  
187 10 linkage groups revealed a striking pattern (Fig. 2A; Fig. S5 for plots along each  
188 chromosome and S6 for results for 100 kb windows). Rather than being randomly distrib-  
189 uted, trees with low concordance scores tended to cluster together in relatively narrow  
190 regions of all 10 chromosomes (Fig. 2A; autocorrelation analysis permutation tests  $p =$   
191  $0.023 - 0.001$ ; Fig. S7). This non-random pattern suggests that local rates of lineage  
192 sorting are determined by differences in the nature and/or strength of selection acting  
193 across the bush monkeyflower genome.

194  
195 *Patterns of genome-wide variation and lineage sorting have been shaped by recurrent*  
196 *linked selection*

197 To gain deeper insight into the evolutionary processes that have shaped patterns  
198 of genome-wide variation, we used summary statistics in 500 kb windows to quantify  
199 patterns of differentiation ( $F_{ST}$ ), divergence ( $d_{xy}$ ), and diversity ( $\pi$ ) among and within  
200 these taxa. The variation in  $F_{ST}$  among all 36 pairs of taxa highlights the continuous  
201 nature of differentiation across the group (Fig. 1B; Fig. S8), with mean window-based  
202 estimates ranging from 0.06 (red vs. yellow ecotypes of *puniceus*) to more than 0.70.  
203 Distributions of absolute divergence ( $d_{xy}$ ) show a similar pattern (Fig. 1C), with mean  
204 values ranging from 0.54% (red vs. yellow ecotypes) to 1.6% (yellow ecotype vs. *M.*  
205 *clevelandii*). More strikingly, the broad distributions of window-based estimates revealed  
206 heterogeneity in levels of differentiation and divergence among genomic regions.  
207 Window-based estimates of nucleotide diversity also vary markedly ( $\pi$ ; Fig. 1D), ranging  
208 from 0.09% to 1.26%, even though mean estimates were very similar among the ingroup  
209 taxa (0.37% to 0.53%) and were only slightly lower in *M. clevelandii* (0.26%).

210 As with tree concordance, these summary statistics showed non-random patterns  
211 of variation across broad regions of the genome ( $p < 0.005$ ; Fig. 2; Fig. S5 Fig. S6; Fig.  
212 S7). To account for the large magnitude of variation in these statistics across all nine taxa  
213 (for  $\pi$ ) or among the 36 pairs of taxa (for  $d_{xy}$  and  $F_{ST}$ ), we normalized the window-based  
214 estimates using  $z$ -transformation and plotted them across the genome (Fig. S5). After  
215 noting that the genome-wide patterns for each statistic were qualitatively similar among  
216 all comparisons, we used principal components analysis to quantify their similarity and  
217 extract a single variable (PC1) that summarized this common pattern (Fig. S5). These  
218 analyses confirmed that patterns of genome-wide variation were highly correlated across  
219 this group of taxa. Indeed, PC1 explained 65.9% of the variation in  $F_{ST}$  across the 36  
220 pairwise comparisons. Further, all comparisons loaded positively onto PC1 (mean  
221 loading = 0.78 s.d. 0.18; Table S4 for all loadings), indicating that peaks and troughs of  
222  $F_{ST}$  tended to occur in the same genomic regions across all comparisons. Similarly,  
223 patterns of genome-wide divergence ( $d_{xy}$ ) and diversity ( $\pi$ ) were highly correlated across  
224 comparisons, with PC1 explaining 69.5% and 84.7% of the variation among the window-  
225 based estimates, respectively. Again, all taxa (for  $\pi$ ) and taxon comparisons (for  $d_{xy}$ )  
226 loaded positively onto the first principal component (mean loading for  $d_{xy} = 0.78$  s.d.  
227 0.18; for  $\pi$ , 0.91 s.d. 0.07). PC1 therefore provides a summary of the original landscapes,  
228 and is effectively the same as taking the mean window-based scores for each statistic ( $r^2$   
229 between PC1 and mean scores  $> 0.995$  for all three statistics).

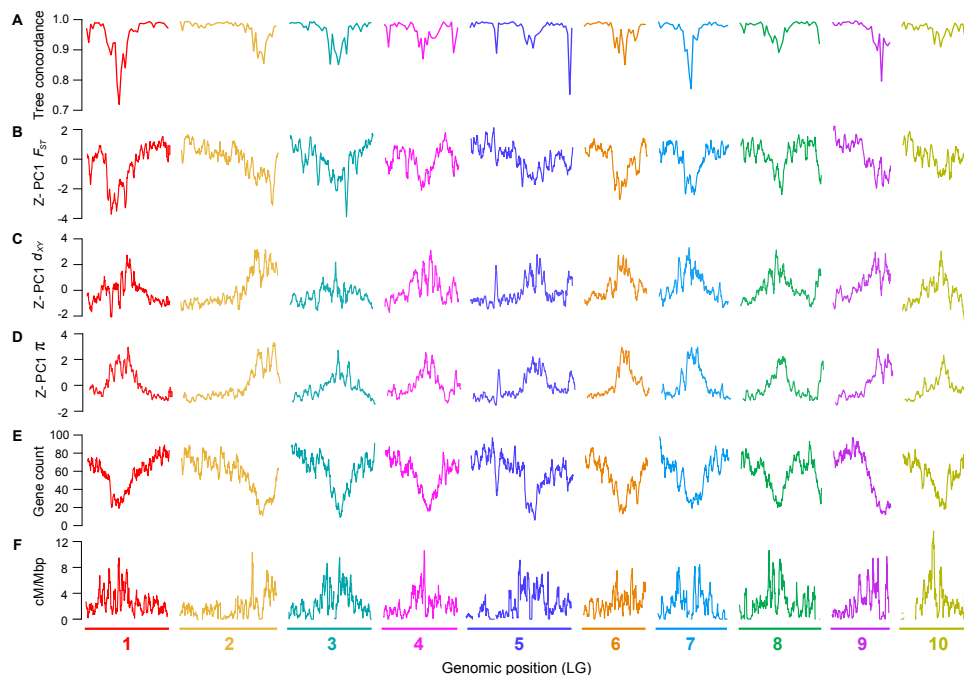

230 **Figure 2. Common differentiation and diversity landscapes mirror variation in the local**  
231 **properties of the genome.** A) Tree concordance scores for 500 kb non-overlapping genomic  
232 windows plotted across the 10 bush monkeyflower chromosomes. B – D) Plots of the  $z$ -  
233 transformed first principal component (PC1) for  $F_{ST}$ ,  $d_{xy}$ , and  $\pi$  in overlapping 500 kb windows  
234 (step size = 50 kb). PC1 explains 66%, 70%, and 85% of the variation in  $F_{ST}$ ,  $d_{xy}$  and  $\pi$ ,  
235 respectively. E – F) Gene count and recombination rate (cM/Mbp) in overlapping 500 kb  
236 windows.

261 Observing similar differentiation, diversity, and divergence ‘landscapes’ among  
262 these taxa suggests that a common mechanism has been responsible for shaping patterns  
263 of genome-wide variation across the radiation. Recent studies have observed correlated  
264 genomic landscapes among related taxa, concluding that they were generated by a shared  
265 pattern of heterogeneous linked selection (48-51). Indeed, if a region experiences a high  
266 level of linked selection across the phylogenetic tree, then it will have both lower  
267 diversity ( $\pi$ ) within species and lower divergence ( $d_{xy}$ ) between species, because  
268 divergence is determined in part by levels of diversity in the common ancestor (15, 16,  
269 22, 24). In agreement with this prediction, we observed a strong positive correlation  
270 between PC1  $d_{xy}$  and PC1  $\pi$  ( $r = 0.84$ ), indicating that regions of the genome with lower  
271 diversity tended to be less diverged in all taxa (Fig. 3, Fig. S9 for scatterplots and Fig.  
272 S10 for results at 100 kb scale). Regions with reduced diversity also tended to show  
273 higher differentiation ( $F_{ST}$ ) ( $r = -0.84$ ) and higher levels of tree concordance ( $r = -0.69$ ),  
274 both of which are predicted by models of linked selection (52).

275

276

277 **Figure 3. Correlations reveal the impact of**  
278 **heterogeneous linked selection across the**  
279 **genome.** Matrix of pairwise correlation  
280 coefficients between PC1  $F_{ST}$ , PC1  $d_{xy}$ , PC1  $\pi$ ,  
281 tree concordance, gene density, and  
282 recombination rate. The heat map and the  
283 shape of the ellipse indicate the strength of the  
284 correlation and its sign. All correlations are  
285 statistically significant at  $p < 0.001$ . Detailed  
286 scatterplots for each relationship can be found  
287 in Fig. S9. See Fig. S10 for a correlation  
288 matrix for 100 kb windows.

289

290

291 We next identified factors that cause variation in the intensity of linked selection  
292 across the bush monkeyflower genome. Its intensity is determined by the local density of  
293 targets of selection relative to the recombination rate (19-22). Specifically, a higher  
294 intensity of linked selection is predicted in regions of the genome that are enriched for  
295 functional elements, because mutations are more likely to have fitness consequences if  
296 they arise in areas that are gene rich. The local recombination rate modulates this effect,  
297 because regions unlinked to functional sites evolve independently of them.

298 To test these predictions, we used our annotated genome and genetic map to  
299 calculate the number of protein coding genes and the average recombination rate  
300 (cM/Mbp) in each 500 kb window (Fig. 2E-F; Fig. S5; Fig. S6). There was a strong  
301 negative correlation between gene count and recombination rate ( $r = -0.40$ ), leading to  
302 large variation in the predicted strength of linked selection across the genome. In  
303 addition, we observed strong correlations between PC1  $\pi$  and both gene count ( $r = -0.84$ )  
304 and recombination rate ( $r = 0.44$ ; Fig. 3; Figs. S9 & S10), both of which indicate that  
305 variation in the intensity of linked selection has shaped common patterns of diversity  
306 across the genome.

307 Despite only having a direct estimate of gene density and recombination rate  
308 variation from one subspecies (*puniceus*), the presence of a common diversity landscape

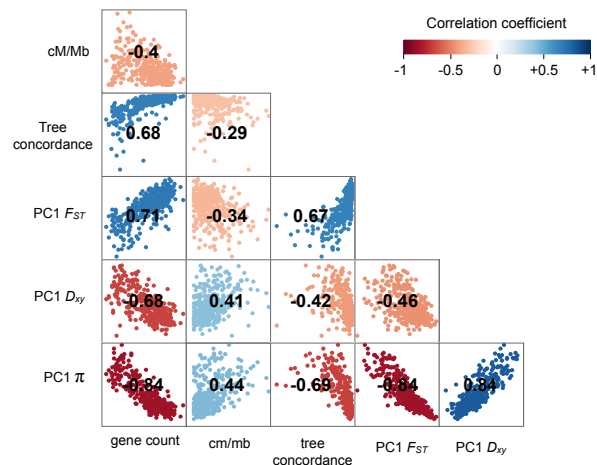

309 implies that the genomic distribution of these features has been conserved in all taxa after  
310 being inherited from their common ancestor. This scenario is consistent with the recent  
311 shared history of the group, and explains how a common pattern of heterogeneous linked  
312 selection has become shared among them.

313

314 *The signature of linked selection becomes stronger with increasing divergence time*

315 Our analyses indicate that linked selection has shaped common patterns of  
316 diversity and differentiation across this radiation. By using the different levels of  
317 divergence between pairs of taxa, we next test predictions about how these signatures  
318 should evolve over time (16). When a population first splits, levels of diversity ( $\pi$ ) and  
319 divergence ( $d_{xy}$ ) are equal, so  $F_{ST}$  will be zero across the genome (Fig. S11 for cartoon  
320 explanation assuming a simple model of allopatric divergence, no spatial structure, and  
321 large  $N_e$ ). As divergence proceeds, differentiation increases, but due to variation in the  
322 intensity of linked selection across the genome, certain regions become differentiated  
323 before others. During the early stages of divergence, when lineage-specific linked  
324 selection has had a minor impact on the genome, patterns of differentiation should only  
325 weakly mirror the footprint of historical linked selection. However, as the divergence  
326 time increases, the cumulative effects of linked selection should strengthen the  
327 relationships between  $F_{ST}$  and  $\pi$ , gene density, and recombination rate. In contrast, the  
328 strength of the correlations between  $\pi$  and gene density and recombination rate should  
329 remain similar over time, because the shape of the diversity landscape is preserved by  
330 recurrent linked selection despite new mutations arising in each lineage.

331 To test these predictions, we determined if the strength of the relationships  
332 between these statistics varied with the level of divergence between taxa. As expected for  
333 a pair of taxa that recently split, the correlation between  $\pi$  and  $d_{xy}$  is almost perfect  
334 between the least divergent pairs of taxa ( $r \sim 1$ ), but the correlation decays over time as  
335 ancestral variants fix and new mutations increase  $d_{xy}$  (Fig. 4A). Remarkably, however,  
336 the strong correlations between  $\pi$  and gene density ( $r \sim 0.8$ ) and  $\pi$  and recombination rate  
337 ( $r \sim 0.4$ ) barely change with increasing divergence time, as expected if linked selection  
338 continues to act on the same regions in each taxon (Fig. 4B-C). By contrast, the  
339 relationships between  $F_{ST}$  and levels of diversity, gene count, and recombination rate all  
340 become stronger with increasing divergence time (Fig. 4D-F), revealing the build up of  
341 heterogeneous differentiation due to the accumulating impact of recurrent linked  
342 selection.

343 In addition to showing that the footprint of linked selection is dynamic, the  
344 sequence of divergence times provides novel insight into when linked selection begins to  
345 shape patterns of differentiation, and how long it takes for this signature to develop (Fig.  
346 5). In population pairs with the most recent divergence times ( $d_{xy} = 0.5\% - 0.7\%$ ), linked  
347 selection's effects on the differentiation landscape are already apparent, as genome-wide  
348 patterns of  $F_{ST}$  are moderately correlated with variation in  $\pi$ , gene count, and  
349 recombination rate ( $r \sim 0.4$ , Fig. 4D-F). This is true even for the parapatric red and  
350 yellow ecotypes of subspecies *puniceus* ( $d_{xy} = 0.5\%$ ), which diverged recently with  
351 ongoing gene flow (31, 32). As divergence continues, the effects of linked selection  
352 become even more pronounced. In the most divergent comparisons ( $d_{xy} = 1.5\%$ ), the  
353 diversity and differentiation landscapes almost perfectly mirror one another ( $r = -0.94$ ;  
354 Fig. 5, Fig. S12). The build-up of such strong correlations in just 1.5 million years is a



355 testament to the power of linked selection to shape genome-wide patterns of variation,  
356 both within and between taxa.

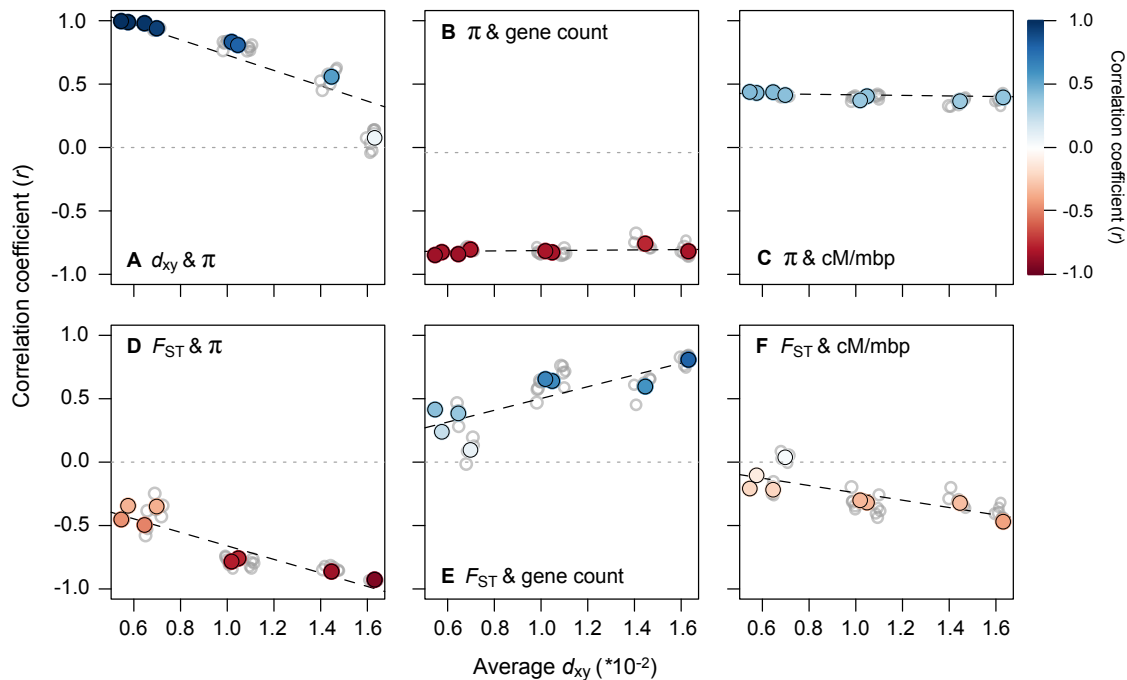

357  
358 **Figure 4. Time-course analysis reveals static and dynamic signatures of recurrent linked**  
359 **selection.** Correlations between variables (500 kb windows) for all 36 taxonomic comparisons  
360 (gray dots) plotted against the average  $d_{xy}$  as a measure of divergence time. The top row shows  
361 how the relationships between  $\pi$  (each window averaged across a pair of taxa) and (A)  $d_{xy}$ , (B)  
362 gene count, and (C) recombination rate vary with increasing divergence time. The bottom row  
363 (D-E) shows the same relationships, but with  $F_{ST}$ . The regressions (dashed lines) in each plot are  
364 fitted to the eight independent contrasts (colored points) obtained using a phylogenetic correction.  
365 The color gradient shows the strength of the correlation. Details for each regression can be found  
366 in Table S5.

367

### 368 *Conclusions and implications*

369 Facilitated by the first chromosome-level genome assembly for the bush  
370 monkeyflower, we show that linked selection has been a primary architect of the common  
371 patterns of diversity, differentiation, and lineage sorting across this recent radiation.  
372 Genome-wide variation in the intensity of linked selection is conserved among these taxa  
373 and is determined by the distribution of functional elements and variation in the local  
374 recombination rate. By taking advantage of the range of divergence times between the  
375 different pairs of monkeyflower taxa, we provide the first empirical picture of how the  
376 signatures of linked selection emerge over time: linked selection occurring within  
377 lineages acts to preserve an ancestral pattern of diversity after a population split, while its  
378 joint action in separate lineages causes a common differentiation landscape to emerge  
379 between them.

380

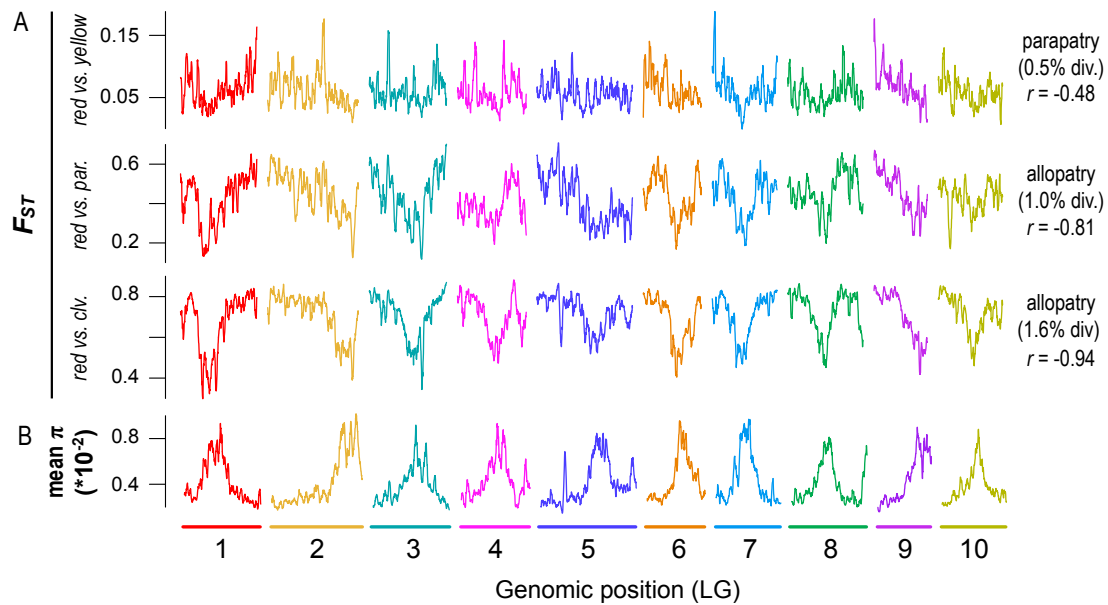

381

382 **Figure 5. Emergence of a heterogeneous differentiation landscape across 1.5 million years of**  
 383 **divergence.** A) Plots of  $F_{ST}$  (500 kb windows) across the genome for pairs of taxa at early (red  
 384 vs. yellow), intermediate (red vs. *parviflorus*) and late stages (red vs. *M. clevelandii*) of  
 385 divergence. B) Average nucleotide diversity (for red, yellow, *par.*, and *clv.*) across the genome in  
 386 500 kb windows. The geographic distribution (parapatric or allopatric), percent sequence  
 387 divergence ( $d_{xy} * 10^{-2}$ ) and correlation between  $F_{ST}$  and mean  $\pi$  are provided next to each  
 388 taxon pair.  
 389

390 In addition to providing a dynamic picture of how the genomic landscape has  
 391 evolved over the first 1.5 millions years of divergence, our study has important  
 392 implications for the fields of molecular evolution and speciation. For example, even  
 393 though the impact of linked selection might be expected to vary across the tree of life due  
 394 to factors like differences in genome size, ploidy, mutation rate, recombination rate, and  
 395 effective population size (53), our findings support previous studies indicating that little  
 396 of the genome evolves free of its effects (6, 14, 18). This suggests that genome-wide  
 397 patterns of diversity, differentiation, and lineage sorting cannot be understood without  
 398 taking the effects of linked selection into account.

399 Our work also has implications for interpreting the genomic landscape in light of  
 400 the speciation process. Although it was initially thought that peaks of differentiation  
 401 would correspond to genomic regions underlying barriers to gene flow between emerging  
 402 species, it is now clear that differentiation landscapes are also shaped by widespread  
 403 selection that is unrelated to speciation (17, 49). For example, recent studies have  
 404 suggested that widespread background selection is likely responsible for generating  
 405 common differentiation landscapes across groups of closely related taxa due to the  
 406 conservation of genomic features among them (15, 16, 54). Although background  
 407 selection would be a straightforward explanation for the correlated patterns of  
 408 differentiation observed across this radiation, a recent simulation study (55) suggests that  
 409 it should not impact the differentiation landscape over most of the range of divergence  
 410 times that we examined. This is especially true for the well-studied red and yellow

411 ecotypes of subspecies *puniceus*, as any effect of background selection should be  
412 nullified when divergence occurs with gene flow (55). Therefore, unless these  
413 simulations failed to capture some important aspect of our study system, other forms of  
414 selection that are relevant to speciation may contribute to the common signature of linked  
415 selection that we, and others, have seen. Although further work is clearly needed to  
416 understand the causes of linked selection, our study shows that characterizing its  
417 signatures is a critical step in understanding the processes that shape genetic variation  
418 within and between populations and species.

419

## 420 **Materials and Methods**

### 421 *Genome assembly, high-density linkage map, and annotation*

422 We used a combination of short-read Illumina and long-read Single Molecule,  
423 Real Time (SMRT) sequencing to assemble the genome of a single individual from the  
424 red ecotype of *M. aurantiacus* subspecies *puniceus* (Table S2 for sample collection  
425 location). To assemble resulting scaffolds into pseudomolecules, we generated a high-  
426 density linkage map from an outbred  $F_2$  mapping population (Table S2 for sample  
427 collection locations). Restriction-site associated DNA sequencing (RADseq) was used to  
428 genotype parents and 269 offspring. Map construction was performed using *Lep-MAP2*  
429 (56). After integrating the assembly and genetic map, we made corrections to the map  
430 order using the physical position of markers within the assembled scaffolds. Genome  
431 annotation was conducted using the MAKER pipeline (57). See supplementary methods  
432 for more details.

433

### 434 *Genome re-sequencing and variant calling*

435 DNA was extracted from 37 individuals (Table S2), and Illumina sequencing was  
436 performed using paired-end 150 bp reads. Raw reads were aligned to the reference  
437 assembly, and variant calling was executed with the GATK pipeline (58) using the  
438 UnifiedGenotyper tool. See supplementary methods for more details.

439

### 440 *Phylogenetic Analyses*

441 We used *RAxML v8* to construct genome-wide phylogenies from a concatenated  
442 alignment of all variable sites and from genomic windows. We tested for a relationship  
443 between node concordance (the number of 500 kb window-based trees that recovered a  
444 given node from the genome-wide tree) and internode length using the internode  
445 distances from the genome-wide analysis. Tree concordance scores were generated from  
446 the correlation between the distance matrix from each window-based tree and the whole-  
447 genome tree. Autocorrelation coefficients for tree concordance scores were calculated in  
448 *R* using custom scripts, and their significance was tested from 1000 random permutations  
449 of the genome-wide data. See supplementary methods for more details.

450

### 451 *Population genomic analyses*

452 Estimates of nucleotide diversity ( $\pi$ ), differentiation ( $F_{ST}$ ), and divergence ( $d_{XY}$ )  
453 for 100 kb and 500 kb windows were calculated using Python scripts downloaded from  
454 [https://github.com/simonhmartin/genomics\\_general](https://github.com/simonhmartin/genomics_general). Principal components analysis was  
455 used to summarize patterns of variation in these statistics across all taxa (for  $\pi$ ) and taxon  
456 comparisons (for  $F_{ST}$  and  $d_{XY}$ ). Average recombination rate (cM/Mbp) for each window

457 was estimated as the average value across three or more adjacent pairs of mapped  
458 markers in each genomic window. Gene density was estimated as the number of  
459 predicted genes in each window. We used linear regression to test if the strength of the  
460 correlations between different statistics changed with the level of divergence using a set  
461 of eight statistically independent contrasts (59, 60). See supplementary methods for  
462 details.

463

#### 464 **Data Accessibility**

465 Raw sequencing reads used for the genome assembly, linkage map construction,  
466 and genome resequencing and are available on the Short-Read Archive (SRA) under the  
467 bioproject ID xxx. The genetic map, annotation, reference genome sequence, and VCF  
468 file have been deposited on DRYAD.

469

#### 470 **Acknowledgments**

471 We thank Bill Cresko and Thomas Nelson for advice and stimulating discussion.  
472 John Willis performed the Illumina mate-pair library preps used for the genome  
473 assembly. Julian Catchen, Clay Small, Susan Bassham, and Janna Fierst provided  
474 technical advice. Doug Turnbull and Maggie Weitzman conducted the Illumina  
475 sequencing at the University of Oregon Genomics Core facility. Thomas Nelson, Martin  
476 Garlovsky, Roger Butlin, Anja Westram and Jeff Ross-Ibarra provided comments on an  
477 earlier version of this manuscript. We also thank people who contributed to insightful  
478 discussions on twitter. Funding was provided by the National Science Foundation grant  
479 DEB-1258199 to MS and the Sloan Foundation to PR.

480

#### 481 **References**

482

- 483 1. Lewontin RC (1974) *The Genetic Basis of Evolutionary Change* (Columbia  
484 University Press, New York).
- 485 2. Lewontin RC & Hubby JL (1966) A molecular approach to the study of genic  
486 heterozygosity in natural populations. II. Amount of variation and degree of  
487 heterozygosity in natural populations of *Drosophila pseudoobscura*. *Genetics*  
488 54(2):595-&.
- 489 3. Kimura M (1968) Evolutionary rate at the molecular level. *Nature*  
490 217(5129):624-626.
- 491 4. Kimura M (1986) DNA and the neutral theory. *Philos Trans Roy Soc Lond B, Biol*  
492 *Sci* 312(1154):343-354.
- 493 5. Gillespie JH (1994) *The Causes of Molecular Evolution* (Oxford University Press  
494 On Demand).
- 495 6. Casillas S & Barbadilla A (2017) Molecular population genetics. *Genetics*  
496 205(3):1003-1035.
- 497 7. Ohta T (1973) Slightly deleterious mutant substitutions in evolution. *Nature*  
498 246(5428):96-98.
- 499 8. Langley CH & Fitch WM (1974) An examination of the constancy of the rate of  
500 molecular evolution. *J Mol Evol* 3(3):161-177.
- 501 9. Kreitman M (1996) The neutral theory is dead. Long live the neutral theory.  
502 *BioEssays* 18(8):678-683.

- 503 10. Hahn MW (2008) Toward a selection theory of molecular evolution. *Evolution*  
504 62(2):255-265.
- 505 11. Langley CH, *et al.* (2012) Genomic variation in natural populations of *Drosophila*  
506 *melanogaster*. *Genetics* 192(2):533-598.
- 507 12. Begun DJ, *et al.* (2007) Population genomics: Whole-genome analysis of  
508 polymorphism and divergence in *Drosophila simulans*. *Plos Biol* 5(11):2534-  
509 2559.
- 510 13. Charlesworth B & Charlesworth D (2018) Neutral variation in the context of  
511 selection. *Mol Biol Evol*.
- 512 14. Kern AD & Hahn MW (2018) The neutral theory in light of natural selection. *Mol*  
513 *Biol Evol*.
- 514 15. Burri R (2017) Dissecting differentiation landscapes: a linked selection's  
515 perspective. *J Evol Biol* 30(8):1501-1505.
- 516 16. Burri R (2017) Interpreting differentiation landscapes in the light of long-term  
517 linked selection. *Evolution Letters* 1:118-131.
- 518 17. Ravinet M, *et al.* (2017) Interpreting the genomic landscape of speciation: a road  
519 map for finding barriers to gene flow. *J Evol Biol* 30(8):1450-1477.
- 520 18. Corbett-Detig RB, Hartl DL, & Sackton TB (2015) Natural selection constrains  
521 neutral diversity across a wide range of species. *Plos Biol* 13(4):e1002112.
- 522 19. Maynard-Smith J & Haigh J (1974) Hitch-hiking effect of a favorable gene. *Genet*  
523 *Res* 23(1):23-35.
- 524 20. Hudson RR & Kaplan NL (1995) Deleterious background selection with  
525 recombination. *Genetics* 141(4):1605-1617.
- 526 21. Gillespie JH (2000) Genetic drift in an infinite population: The pseudohitchhiking  
527 model. *Genetics* 155(2):909-919.
- 528 22. Charlesworth B, Morgan MT, & Charlesworth D (1993) The effect of deleterious  
529 mutations on neutral molecular variation. *Genetics* 134(4):1289-1303.
- 530 23. Coop G & Ralph P (2012) Patterns of neutral diversity under general models of  
531 selective sweeps. *Genetics* 192(1):205-224.
- 532 24. Charlesworth B (1998) Measures of divergence between populations and the  
533 effect of forces that reduce variability. *Mol Biol Evol* 15(5):538-543.
- 534 25. Pease JB & Hahn MW (2013) More accurate phylogenies inferred from low-  
535 recombination regions in the presence of incomplete lineage sorting. *Evolution*  
536 67(8):2376-2384.
- 537 26. Cutter AD & Payseur BA (2013) Genomic signatures of selection at linked sites:  
538 unifying the disparity among species. *Nature Rev Gen* 14(4):262-274.
- 539 27. Chase MA, Stankowski S, & Streisfeld MA (2017) Genomewide variation  
540 provides insight into evolutionary relationships in a monkeyflower species  
541 complex (*Mimulus* sect. *Diplacus*). *Am J Bot* 104(10):1510-1521.
- 542 28. McMinn HE (1951) Studies in the genus *Diplacus*, Scrophulariaceae. *Madrono*  
543 11:33-128.
- 544 29. Thompson DM (2005) Systematics of *Mimulus* subgenus *Schizoplacus*  
545 (*Scrophulariaceae*). *Systematic Botany Monographs* 75:1-213.
- 546 30. Sobel JM & Streisfeld MA (2015) Strong premating reproductive isolation drives  
547 incipient speciation in *Mimulus aurantiacus*. *Evolution* 69(2):447-461.

- 548 31. Stankowski S, Sobel JM, & Streisfeld MA (2017) Geographic cline analysis as a  
549 tool for studying genome-wide variation: a case study of pollinator-mediated  
550 divergence in a monkeyflower. *Mol Ecol* 26(1):107-122.
- 551 32. Stankowski S, Sobel JM, & Streisfeld MA (2015) The geography of divergence  
552 with gene flow facilitates multitrait adaptation and the evolution of pollinator  
553 isolation in *Mimulus aurantiacus*. *Evolution* 69(12):3054-3068.
- 554 33. Stankowski S & Streisfeld MA (2015) Introgressive hybridization facilitates  
555 adaptive divergence in a recent radiation of monkeyflowers. *P Roy Soc B-Biol Sci*  
556 282(1814):154-162.
- 557 34. Streisfeld MA & Kohn JR (2007) Environment and pollinator-mediated selection  
558 on parapatric floral races of *Mimulus aurantiacus*. *J Evol Biol* 20(1):122-132.
- 559 35. Streisfeld MA & Kohn JR (2005) Contrasting patterns of floral and molecular  
560 variation across a cline in *Mimulus aurantiacus*. *Evolution* 59(12):2548-2559.
- 561 36. Streisfeld MA, Young WN, & Sobel JM (2013) Divergent Selection Drives  
562 Genetic Differentiation in an R2R3-MYB Transcription Factor That Contributes  
563 to Incipient Speciation in *Mimulus aurantiacus*. *Plos Genet* 9(3).
- 564 37. Vickery RK (1995) Speciation by Aneuploidy and Polyploidy in *Mimulus*  
565 (*Scrophulariaceae*). *Great Basin Nat* 55(2):174-176.
- 566 38. Simao FA, Waterhouse RM, Ioannidis P, Kriventseva EV, & Zdobnov EM (2015)  
567 BUSCO: assessing genome assembly and annotation completeness with single-  
568 copy orthologs. *Bioinformatics* 31(19):3210-3212.
- 569 39. Hudson RR (1990) Gene genealogies and the coalescent process. *Oxford Surveys*  
570 *in Evolutionary Biology* 7:44.
- 571 40. Tajima F (1983) Evolutionary Relationship of DNA-Sequences in Finite  
572 Populations. *Genetics* 105(2):437-460.
- 573 41. Maddison WP (1997) Gene trees in species trees. *Syst Biol* 46(3):523-536.
- 574 42. Pease JB, Haak DC, Hahn MW, & Moyle LC (2016) Phylogenomics Reveals  
575 Three Sources of Adaptive Variation during a Rapid Radiation. *Plos Biol* 14(2).
- 576 43. Stamatakis A (2014) RAxML version 8: a tool for phylogenetic analysis and post-  
577 analysis of large phylogenies. *Bioinformatics* 30(9):1312-1313.
- 578 44. Lamichhaney S, *et al.* (2015) Evolution of Darwin's finches and their beaks  
579 revealed by genome sequencing. *Nature* 518(7539):371-375.
- 580 45. Richards EJ & Martin CH (2017) Adaptive introgression from distant Caribbean  
581 islands contributed to the diversification of a microendemic adaptive radiation of  
582 trophic specialist pupfishes. *Plos Genet* 13(8).
- 583 46. Pamilo P & Nei M (1988) Relationships between Gene Trees and Species Trees.  
584 *Mol Biol Evol* 5(5):568-583.
- 585 47. Suh A, Smeds L, & Ellegren H (2015) The Dynamics of Incomplete Lineage  
586 Sorting across the Ancient Adaptive Radiation of Neoavian Birds. *Plos Biol*  
587 13(8).
- 588 48. Poelstra JW, *et al.* (2014) The genomic landscape underlying phenotypic integrity  
589 in the face of gene flow in crows. *Science* 344(6190):1410-1414.
- 590 49. Burri R, *et al.* (2015) Linked selection and recombination rate variation drive the  
591 evolution of the genomic landscape of differentiation across the speciation  
592 continuum of *Ficedula* flycatchers. *Genome Res* 25(11):1656-1665.

- 593 50. Van Doren BM, *et al.* (2017) Correlated patterns of genetic diversity and  
594 differentiation across an avian family. *Mol Ecol* 26(15):3982-3997.
- 595 51. Vijay N, *et al.* (2017) Genomewide patterns of variation in genetic diversity are  
596 shared among populations, species and higher-order taxa. *Mol Ecol* 26(16):4284-  
597 4295.
- 598 52. Cruickshank TE & Hahn MW (2014) Reanalysis suggests that genomic islands of  
599 speciation are due to reduced diversity, not reduced gene flow. *Mol Ecol*  
600 23(13):3133-3157.
- 601 53. Slotte T (2014) The impact of linked selection on plant genomic variation. *Brief*  
602 *Funct Genomics* 13(4):268-275.
- 603 54. Ellegren H & Wolf JBW (2017) Parallelism in genomic landscapes of  
604 differentiation, conserved genomic features and the role of linked selection. *J*  
605 *Evol Biol* 30(8):1516-1518.
- 606 55. Matthey-Doret R & Whitlock MC (2018) Background selection and the statistics  
607 of population differentiation: consequences for detecting local adaptation.  
608 *BiorXiv*.
- 609 56. Rastas P, Calboli FCF, Guo BC, Shikano T, & Merila J (2016) Construction of  
610 Ultradense Linkage Maps with Lep-MAP2: Stickleback F-2 Recombinant Crosses  
611 as an Example. *Genome Biol Evol* 8(1):78-93.
- 612 57. Holt C & Yandell M (2011) MAKER2: an annotation pipeline and genome-  
613 database management tool for second-generation genome projects. *BMC*  
614 *bioinformatics* 12:491.
- 615 58. McKenna A, *et al.* (2010) The Genome Analysis Toolkit: A MapReduce  
616 framework for analyzing next-generation DNA sequencing data. *Genome Res*  
617 20(9):1297-1303.
- 618 59. Felsenstein J (1985) Phylogenies and the comparative method. *American*  
619 *Naturalist* 125:1-15.
- 620 60. Coyne JA & A. OH (1989) Patterns of speciation in *Drosophila*. *Evolution*  
621 43:362-381.

622  
623  
624 *Figure captions*

625 **Figure 1. Evolutionary relationships and patterns of genome-wide variation across**  
626 **the radiation.** A) The black tree was constructed from a concatenated alignment of  
627 genome-wide SNPs and is rooted using *M. clevelandii*. The 387 gray trees were  
628 constructed from 500 kb genomic windows. The first number associated with each node  
629 or taxon is the bootstrap support for that clade in the whole genome tree, and the second  
630 number is the percentage of window-based trees in which that clade is present. B) Levels  
631 of differentiation ( $F_{ST}$ ), C) divergence ( $d_{xy}$ ), and D) diversity ( $\pi$ ) within and among taxa  
632 based on the same 500 kb windows. For simplicity,  $F_{ST}$  and  $d_{xy}$  are shown only for  
633 comparisons with the red ecotype of subspecies *puniceus*.

634  
635 **Figure 2. Common differentiation and diversity landscapes mirror variation in the**  
636 **local properties of the genome.** A) Tree concordance scores for 500 kb non-overlapping  
637 genomic windows plotted across the 10 bush monkeyflower chromosomes. B – D) Plots  
638 of the  $z$ -transformed first principal component (PC1) for  $F_{ST}$ ,  $d_{xy}$ , and  $\pi$  in overlapping

639 500 kb windows (step size = 50 kb). PC1 explains 66%, 70%, and 85% of the variation in  
640  $F_{ST}$ ,  $d_{xy}$  and  $\pi$ , respectively. E – F) Gene count and recombination rate (cM/Mbp) in  
641 overlapping 500 kb windows.

642

643 **Figure 3. Correlations reveal the impact of heterogeneous linked selection across the**  
644 **genome.** Matrix of pairwise correlation coefficients between PC1  $F_{ST}$ , PC1  $d_{xy}$ , PC1  $\pi$ ,  
645 tree concordance, gene density, and recombination rate. The heat map and the shape of  
646 the ellipse indicate the strength of the correlation and its sign. All correlations are  
647 statistically significant at  $p < 0.001$ . Detailed scatterplots for each relationship can be  
648 found in Fig. S9. See Fig. S10 for a correlation matrix for 100 kb windows.

649

650 **Figure 4. Time-course analysis reveals static and dynamic signatures of recurrent**  
651 **linked selection.** Correlations between variables (500 kb windows) for all 36 taxonomic  
652 comparisons (gray dots) plotted against the average  $d_{xy}$  as a measure of divergence time.  
653 The top row shows how the relationships between  $\pi$  (each window averaged across a pair  
654 of taxa) and (A)  $d_{xy}$ , (B) gene count, and (C) recombination rate vary with increasing  
655 divergence time. The bottom row (D-E) shows the same relationships, but with  $F_{ST}$ . The  
656 regressions (dashed lines) in each plot are fitted to the eight independent contrasts  
657 (colored points) obtained using a phylogenetic correction. The color gradient shows the  
658 strength of the correlation. Details for each regression can be found in Table S5.

659

660 **Figure 5. Emergence of a heterogeneous differentiation landscape across 1.5 million**  
661 **years of divergence.** A) Plots of  $F_{ST}$  (500 kb windows) across the genome for pairs of  
662 taxa at early (red vs. yellow), intermediate (red vs. *parviflorus*) and late stages (red vs. *M.*  
663 *clevelandii*) of divergence. B) Average nucleotide diversity (for red, *yellow*, *par.*, and  
664 *clv.*) across the genome in 500 kb windows. The geographic distribution (parapatric or  
665 allopatric), percent sequence divergence ( $d_{xy} * 10^{-2}$ ) and correlation between  $F_{ST}$  and mean  
666  $\pi$  are provided next to each taxon pair.

667

668

669

670

671



*Supplementary information for:*

## **The tempo of linked selection: rapid emergence of a heterogeneous genomic landscape during a radiation of monkeyflowers**

Sean Stankowski<sup>1,2,§</sup>, Madeline A. Chase<sup>1,3,§</sup>, Allison M. Fuiten<sup>1</sup>, Peter L. Ralph<sup>1</sup>, and Matthew A. Streisfeld<sup>1\*</sup>.

<sup>1</sup>Institute of Ecology and Evolution, 335 Pacific Hall 5289, University of Oregon, Eugene, OR 97405, USA

<sup>2</sup>Present address: Department of Animal and Plant Sciences, University of Sheffield, Sheffield S10 2TN, UK

<sup>3</sup>Present address: Department of Evolutionary Biology, Evolutionary Biology Centre (EBC), Uppsala University, Uppsala, Sweden

<sup>§</sup>These authors contributed equally to this work

\*Corresponding author: [mstreis@uoregon.edu](mailto:mstreis@uoregon.edu)

### **ORCID ids:**

SS: <https://orcid.org/0000-0003-0472-9299>; MAC: <https://orcid.org/0000-0002-7916-3560>; AMF: <https://orcid.org/0000-0003-3926-5455> PLR: <https://orcid.org/0000-0002-9459-6866>; MAS: <https://orcid.org/0000-0002-2660-8642>

## Supplementary Materials and Methods

### *Genome Assembly*

We used a combination of short-read Illumina and long-read Single Molecule, Real Time (SMRT) sequencing to assemble the genome of a single individual from the red ecotype of *M. aurantiacus* subspecies *puniceus* (population UCSD; Table S1). Genomic DNA was isolated from leaf tissue using either ZR plant/seed DNA miniprep kits (Zymo Research) or GeneJet Plant Genomic DNA purification kits (Thermo Fisher). Illumina libraries were generated following the *Allpaths-LG* assembly pipeline (Gnerre et al. 2011), which included a single fragment library with average 180 bp insert size and three mate pair libraries (average insert sizes: 3.5-5 kb, 5-7 kb, and 7-13 kb). Libraries were sequenced on the Illumina HiSeq 2500 using paired-end 100 bp reads. An initial scaffold-level assembly was performed with *Allpaths-LG* using default parameters and the *haploidify* function enabled. This assembly yielded 11,123 contigs (N50 = 40.5 kb) and 2,299 scaffolds (N50 = 1,310 kb), for a total assembly size of 193.3 Mbp. Long-read sequencing was performed from the same individual using 12 SMRT cells sequenced on the Pacific Biosystems RS II machine at Duke University. We obtained a total of 6.4 Gbp of sequence, which corresponds to  $\sim 21 \times$  coverage of the genome. The PacBio reads were used to re-scaffold the *Allpaths-LG* scaffolds using *Opera-LG* (Gao et al. 2016). This reduced the number of scaffolds to 1,547 (N50 = 1,578 kb).

We then manually improved the scaffold containing the flower color gene *MaMyb2* (Streisfeld et al. 2013). We first aligned this scaffold to a previously published draft sequence assembly from this same individual (Stankowski et al. 2017), which was generated using Illumina short-reads and the *Velvet* assembler (Zerbino and Birney 2008). We used long range PCR and cloning to generate Sanger sequences across three regions within 20 kb of *MaMyb2* that did not assemble well. Genomic DNA was amplified using Phusion high fidelity polymerase (NEB). PCR products were cloned into the pCR2.1 TOPO-TA vector (Life Technologies), and purified plasmids were sequenced with Sanger technology. Resulting sequences were aligned to the scaffold containing *MaMyb2*, and new PCR primers were designed to sequence internal fragments until the entire insert was sequenced. Using this approach, we sequenced a total of 9,824 bp across the three regions. The reference sequence in the assembly was corrected manually to match the Sanger data.

Finally, we gap filled the assembly using the PacBio data and the program *PBJelly* (English et al. 2012). Resulting scaffolds were assembled into pseudomolecules using *Chromonomer* (<http://catchenlab.life.illinois.edu/chromonomer/>), according to the online manual. This software anchored and oriented scaffolds based on the order of markers in a high-density linkage map (see below) and made corrections to scaffolds when differences occurred between the genetic and physical positions of markers in the map. A final round of gap filling with *PBJelly* was performed to fill any gaps that were created by broken scaffolds in *Chromonomer*. To assess the completeness of the gene space in the assembly, we used both the BUSCO and CEGMA pipelines to estimate the proportion of 956 single copy plant genes (BUSCO) or 248 core eukaryotic genes (CEGMA) that were completely or partially assembled (Parra et al. 2007; Simao et al. 2015). The proportion of these genes present in an assembly has been shown to be correlated with the total proportion of assembled gene space, and thus serves as a good predictor of assembly completeness.

### *Construction of high-density linkage map*

We generated an outbred F<sub>2</sub> mapping population by crossing two F<sub>1</sub> individuals, each the product of crosses between different greenhouse-raised red and yellow ecotype plants collected from one red ecotype and one yellow ecotype population (populations UCSD and LO, respectively; Table S1). We then used restriction-site associated DNA sequencing (RADseq) to genotype F<sub>1</sub> and F<sub>2</sub> individuals. DNA was extracted from leaf material using Zymo ZR plant/seed DNA miniprep kits, and RAD library preparation followed the protocol outlined in Sobel and Streisfeld (Sobel and Streisfeld 2015). Libraries were sequenced on the Illumina HiSeq 2000 platform using single-end 100 bp reads at the Genomics Core Facility, University of Oregon.

Reads were filtered based on quality, and errors in the barcode sequence or RAD site were corrected using the *process\_radtags* script in *Stacks* v. 1.35 (Catchen et al. 2011; Catchen et al. 2013). Loci were created using the *denovo\_map.pl* function of *Stacks*, with three identical raw reads required to create a stack, two mismatches allowed between loci for an individual, and two mismatches allowed when processing the catalog. Single nucleotide polymorphisms (SNPs) were determined and genotypes called using a maximum-likelihood (ML) statistical model implemented in *Stacks* and a stringent  $\chi^2$  significance level of 0.01 to distinguish between heterozygotes and homozygotes. We then used the *genotypes* program implemented in *Stacks* to identify a set of 9,029 mappable markers. We specified a ‘CP’ cross design (F<sub>1</sub> individuals coded as the parents), requiring that a marker was present in at least 85% of progeny at a minimum depth of 12 reads per individual, and we allowed automated corrections to be made to the data.

Linkage map construction was performed using *Lep-MAP2* (Rastas et al. 2016). The data were filtered using the *Filtering* module to include only individuals with less than 15% missing data and excluded markers that showed evidence for extreme segregation distortion ( $\chi^2$  test,  $P < 0.01$ ). To assign markers to linkage groups, we used the *SeparateChromosomes* module with a logarithm of odds (LOD) score limit of 20 and no minimum size for linkage groups (LG). This assigned 7,217 markers to 10 linkage groups, which matches the number of chromosomes in *M. aurantiacus*. The *JoinSingles* module was executed again with a LOD limit of 10 to join an additional 877 ungrouped markers to the 10 previously formed LGs. Fifty-seven singles that were not joined at this stage were discarded from the dataset. Initial marker orders were determined using sex-averaged and sex-specific recombination rates using the *OrderMarkers* module. For each LG, we conducted 10 independent runs using the Kosambi mapping function (*useKosambi=1*), with the dataset split into seven pseudofamilies to take advantage of parallel processing. When multiple markers had identical genotypes, only the duplicate marker with the least missing data was used in marker ordering. We retained the marker order from the run with the best likelihood. After removing markers with an error rate  $> 0.05$ , the ML order was re-evaluated using the *evaluateOrder* flag. The map contained 8,094 informative loci from 269 F<sub>2</sub> individuals, with an average of  $3.5\% \pm \text{SD } 3.86$  missing data per individual.

After the integration of our assembly and genetic map using the *Chromonomer* software (Amores et al. 2014), we made corrections to the map order based on the physical position of markers within assembled scaffolds. Using the output of

*Chromonomer*, we identified markers that were out of order in the map compared to their local assembly order and aligned these markers to the assembly from *Chromonomer* using *Bowtie2* v. 2.2.5 (Langmead and Salzberg 2012) with the *very\_sensitive* settings to obtain their physical order. We then re-estimated the map using the *evaluateOrder* flag in *Lep-MAP2* as described above, but with the marker order constrained to the physical order (*improveOrder=0*) and with all duplicate markers included in the analysis (*removeDuplicates=0*). After initial map construction, we removed 17 markers with an estimated error rate greater than 5% and estimated the map one last time using the same settings. The final map contained 7,589 markers across the 10 linkage groups.

### Genome annotation

Prior to genome annotation, the assembly was soft-masked for repetitive elements and areas of low complexity with *RepeatMasker* (RepeatMasker Open-4.0) using a custom *Mimulus aurantiacus* library created by *RepeatModeler* (RepeatModeler Open-1.0), Repbase repeat libraries (Jurka et al. 2005), and a list of known transposable elements provided by *MAKER* (Holt and Yandell 2011). In total, 30.99% of the genome assembly was masked by *RepeatMasker*. Repetitive elements were annotated with *RepeatModeler*. Hidden Markov Models for gene prediction were generated by *SNAP* (Korf 2004) and *Augustus* (Stanke and Waack 2003) and were trained iteratively to the assembly using *MAKER*, as described by Cantarel et al. (Cantarel et al. 2008). Training was performed on the 14.5 Mbp sequence from LG9. Evidence used by *MAKER* for annotation included protein sequences from *Arabidopsis thaliana*, *Oryza sativa*, *Solanum lycopersicum*, *Solanum tuberosum*, *Daucus carota*, *Vitis vinifera* (all downloaded from EnsemblPlants on 9 August 2016), *Salvia miltiorrhiza* (downloaded from Herbal Medicine Omics Database on 9 August 2016), *Mimulus guttatus* v. 2 (downloaded from JGI Genome Portal on 9 August 2016), and all Uniprot/swissprot proteins (downloaded on 18 August 2016) (Goodstein et al. 2012; Nordberg et al. 2013; Kersey et al. 2016) (Herbal Medicine Omics Database; Uniprot). We filtered the annotations with *MAKER* to include: 1) only evidence-based information that also contained assembled protein support, and 2) those *ab initio* gene predictions that did not overlap with the evidence-based annotations and that contained protein family domains, as detected with InterProScan (Quevillon et al. 2005).

### Genome re-sequencing and variant calling

We collected leaf tissue from four to five individuals from seven subspecies of *M. aurantiacus*, including both ecotypes of subspecies *puniceus* (Table S3; Fig. S2). In addition, we collected leaf tissue from three individuals of *M. clevelandii*. We extracted DNA from dried tissue using the Zymo Plant/Seed MiniPrep DNA kit following the manufacturer's instructions. We prepared sequencing libraries using the Kapa Biosystems HyperPrep kit, and libraries with an insert size between 400-600 bp were sequenced on the Illumina HiSeq 4000 using paired-end 150 bp reads at the Genomics Core Facility, University of Oregon.

We filtered raw reads using the *process\_shortreads* script in *Stacks* v1.46 to remove reads with uncalled bases or poor quality scores. We then aligned the retained reads to the reference assembly using the BWA-MEM algorithm in *BWA* v0.7.15 (Li 2013). An average of 91.7% of reads aligned (range: 82.6-96.0%), and the average

sequencing depth was 21x (range: 15.16 – 30.86x). We then marked PCR duplicates using *Picard* (<http://broadinstitute.github.io/picard>). We performed an initial run of variant calling using the UnifiedGenotyper tool in *GATK* v3.8 (McKenna et al. 2010) and filtered the data to remove variants with a mapping quality < 50, a quality depth < 4, and a Fisher Strand score > 50. We then used these variants to perform base quality score recalibration for each individual, before performing another run of the UnifiedGenotyper to call final variants. After the second run of variant calling, we removed variants with a mapping quality < 40, a quality depth < 2, and a Fisher Strand score > 60. The final dataset contained 13,233,829 SNPs across the nine taxa. Finally, we ran UnifiedGenotyper with the EMIT\_ALL\_SITES option to output all variant and invariant genotyped sites.

### *Phylogenetic analyses*

Initially, we used *RAxML* v8 to reconstruct the evolutionary relationships among the nine taxa by concatenating variant sites from across the genome. To investigate patterns of phylogenetic discordance across the genome, we also built trees from windows across the genome. We phased SNPs using *BEAGLE* v4.1 (Browning and Browning 2007), using a window size of 100 kb and an overlap of 10 kb. We incorporated information on recombination rate from the genetic map and did not impute missing genotypes. After phasing, we used *MVFtools* (<https://www.github.com/jbpease/mvftools>) to run *RAxML* from 100 kb and 500 kb nonoverlapping windows, with the *M. clevelandii* samples set as the outgroups. We then visualized the window trees in *DensiTree* v2.01 (Bouckaert 2010).

To assess concordance between the window-based trees and the whole-genome tree, we converted trees to distance matrices using the *Ape* package in R (Paradis et al. 2004). We then calculated the Pearson's correlation coefficient between the distance matrix from each window and the whole-genome tree, with a stronger correlation indicating higher concordance with the whole-genome tree. We used one-dimensional autocorrelation analysis to determine if variation in tree concordance was randomly distributed across the genome. This involved estimating the autocorrelation between genomic position and tree concordance for each LG with a lag size of 2 Mbp. The significance of the observed value for each LG was determined from a null distribution of autocorrelation coefficients estimated from 1000 random permutations of the genome-wide data.

We also conducted a Principal Components Analysis (PCA) based on all variant sites from across the entire genome using *Plink* v. 1.90 (Chang et al. 2015). Initially, we ran the PCA with all 37 samples, but we consecutively re-ran the analysis by removing different taxa in order to assess clustering patterns among more closely related samples.

### *Population genomic analyses*

To examine how genome-wide patterns of diversity, differentiation, and divergence varied among taxa, we calculated within-taxon nucleotide diversity ( $\pi$ ), between-taxon relative differentiation ( $F_{ST}$ ), and between-taxon absolute divergence ( $d_{xy}$ ) across non-overlapping 100 kb and 500 kb windows using custom Python scripts downloaded from [https://github.com/simonhmartin/genomics\\_general](https://github.com/simonhmartin/genomics_general). We calculated measures of differentiation and divergence across all 36 pairwise comparisons among the nine taxa,

and diversity was estimated separately for each taxon. These scripts estimated  $\pi$  and  $d_{xy}$  by dividing the number of sequence differences within a window (either within or between taxa) by the total number of sites in that window. To account for missing data, the script counted the number of differences between each sample, divided by the total number of variant sites that were genotyped within those samples, and then averaged across all pairs of samples. To provide an unbiased estimate of diversity and divergence, we incorporated invariant sites into the calculation by dividing the number of pairwise differences (within and between taxa, respectively) by the total number of genotyped sites (variant and invariant) within a window.  $F_{ST}$  was calculated following the measure of  $K_{ST}$  (Hudson et al. 1992), equation 9), but was modified to incorporate missing data using the same approach as  $\pi$  and  $d_{xy}$ . We filtered the data separately for each taxonomic comparison, so that each site was required to be genotyped in at least three individuals for comparisons within the *M. aurantiacus* complex or at least two individuals for each comparison involving *M. clevelandii*.

We summarized the variation in each statistic across comparisons using a Principal Components Analysis (PCA), with taxon or taxon pair as the variables. Thus, across each window, the first principal component of  $\pi$ ,  $F_{ST}$ , and  $d_{xy}$  provided multivariate measures that explained the greatest covariance in the data. We used a one-dimensional autocorrelation analysis and permutation test to determine if the genome-wide patterns of PC1  $\pi$ ,  $F_{ST}$ , and  $d_{xy}$  departed from a random expectation, as described above for tree concordance (see section ‘phylogenetic analyses’).

To examine the relationships among PC1 diversity, differentiation, and divergence, we estimated Pearson’s correlation coefficient among all three statistics across genomic windows. Further, we estimated correlations among these three statistics and tree concordance, gene density, and recombination rate. Recombination rate was estimated by comparing the genetic and physical distance (in cM/Mbp) between all pairs of adjacent markers on each LG from the genetic linkage map described above. We removed the top 5% of recombination rates, as these represented unrealistically high values of recombination. A minimum of three estimates was required to obtain an average recombination rate estimate within each window. Gene density was calculated from the number of predicted genes in each window, as determined from the annotation described above.

To determine how the correlations among the statistics (diversity, differentiation, divergence, recombination rate, gene count) changed with increasing divergence time, we examined the correlation coefficient among all pairs of statistics individually for each of the 36 pairwise comparisons. Because diversity was measured within taxa rather than between them, we calculated the mean value of  $\pi$  between each pair of taxa. Also, because many of the pairwise comparisons are non-independent, we applied the phylogenetic correction outlined by (Felsenstein 1985; Coyne and A. 1989) to produce a statistically independent set of data points for this analysis.

As a measure of the divergence time between *M. clevelandii* and *M. aurantiacus*, we estimated the percent sequence divergence ( $d_{xy}$ ) between individuals of *M. clevelandii* and all subspecies of *M. aurantiacus* combined. We then converted this value into a divergence time  $T$  (in generations) using the equation:  $T = d_{xy}/(2\mu)$ , where  $\mu$  is the mutation rate,  $1.5 \times 10^{-8}$  (Koch et al. 2001; Brandvain et al. 2014). This value was then converted into years by multiplying by a generation time of two years.

## Supplemental References

- Amores, A., J. Catchen, I. Nanda, W. Warren, R. Walter, M. Schartl, and J. H. Postlethwait. 2014. A RAD-tag genetic map for the platyfish (*Xiphophorus maculatus*) reveals mechanisms of karyotype evolution among teleost fish. *Genetics* 197:625-641.
- Bouckaert, R. R. 2010. DensiTree: making sense of sets of phylogenetic trees. *Bioinformatics* 26:1372-1373.
- Brandvain, Y., A. M. Kenney, L. Flagel, G. Coop, and A. L. Sweigart. 2014. Speciation and Introgression between *Mimulus nasutus* and *Mimulus guttatus*. *Plos Genet* 10.
- Browning, S. R., and B. L. Browning. 2007. Rapid and accurate haplotype phasing and missing-data inference for whole-genome association studies by use of localized haplotype clustering. *Am J Hum Genet* 81:1084-1097.
- Cantarel, B. L., I. Korf, S. M. C. Robb, G. Parra, E. Ross, B. Moore, C. Holt, A. S. Alvarado, and M. Yandell. 2008. MAKER: An easy-to-use annotation pipeline designed for emerging model organism genomes. *Genome Res* 18:188-196.
- Catchen, J., P. A. Hohenlohe, S. Bassham, A. Amores, and W. A. Cresko. 2013. Stacks: an analysis tool set for population genomics. *Mol Ecol* 22:3124-3140.
- Catchen, J. M., A. Amores, P. Hohenlohe, W. Cresko, and J. H. Postlethwait. 2011. Stacks: Building and Genotyping Loci De Novo From Short-Read Sequences. *G3-Genes Genom Genet* 1:171-182.
- Chang, C. C., C. C. Chow, L. C. A. M. Tellier, S. Vattikuti, S. M. Purcell, and J. J. Lee. 2015. Second-generation PLINK: rising to the challenge of larger and richer datasets. *Gigascience* 4.
- Coyne, J. A., and O. H. A. 1989. Patterns of speciation in *Drosophila*. *Evolution* 43:362-381.
- English, A. C., S. Richards, Y. Han, M. Wang, V. Vee, J. Qu, X. Qin, D. M. Muzny, J. G. Reid, K. C. Worley, and R. A. Gibbs. 2012. Mind the gap: upgrading genomes with Pacific Biosciences RS long-read sequencing technology. *PloS one* 7:e47768.
- Felsenstein, J. 1985. Phylogenies and the comparative method. *American Naturalist* 125:1-15.
- Gao, S., D. Bertrand, B. K. Chia, and N. Nagarajan. 2016. OPERA-LG: efficient and exact scaffolding of large, repeat-rich eukaryotic genomes with performance guarantees. *Genome biology* 17:102.
- Gnerre, S., I. Maccallum, D. Przybylski, F. J. Ribeiro, J. N. Burton, B. J. Walker, T. Sharpe, G. Hall, T. P. Shea, S. Sykes, A. M. Berlin, D. Aird, M. Costello, R. Daza, L. Williams, R. Nicol, A. Gnirke, C. Nusbaum, E. S. Lander, and D. B. Jaffe. 2011. High-quality draft assemblies of mammalian genomes from massively parallel sequence data. *Proceedings of the National Academy of Sciences of the United States of America* 108:1513-1518.
- Goodstein, D. M., S. Shu, R. Howson, R. Neupane, R. D. Hayes, J. Fazo, T. Mitros, W. Dirks, U. Hellsten, N. Putnam, and D. S. Rokhsar. 2012. Phytozome: a comparative platform for green plant genomics. *Nucleic acids research* 40:D1178-1186.

- Holt, C., and M. Yandell. 2011. MAKER2: an annotation pipeline and genome-database management tool for second-generation genome projects. *BMC bioinformatics* 12:491.
- Hudson, R. R., D. D. Boos, and N. L. Kaplan. 1992. A Statistical Test for Detecting Geographic Subdivision. *Mol Biol Evol* 9:138-151.
- Jurka, J., V. V. Kapitonov, A. Pavlicek, P. Klonowski, O. Kohany, and J. Walichiewicz. 2005. Repbase Update, a database of eukaryotic repetitive elements. *Cytogenetic and genome research* 110:462-467.
- Kersey, P. J., J. E. Allen, I. Armean, S. Boddu, B. J. Bolt, D. Carvalho-Silva, M. Christensen, P. Davis, L. J. Falin, C. Grabmueller, J. Humphrey, A. Kerhornou, J. Khobova, N. K. Aranganathan, N. Langridge, E. Lowy, M. D. McDowall, U. Maheswari, M. Nuhn, C. K. Ong, B. Overduin, M. Paulini, H. Pedro, E. Perry, G. Spudich, E. Tapanari, B. Walts, G. Williams, M. Tello-Ruiz, J. Stein, S. Wei, D. Ware, D. M. Bolser, K. L. Howe, E. Kulesha, D. Lawson, G. Maslen, and D. M. Staines. 2016. Ensembl Genomes 2016: more genomes, more complexity. *Nucleic acids research* 44:D574-580.
- Koch, M., B. Haubold, and T. Mitchell-Olds. 2001. Molecular systematics of Brassicaceae: evidence from plastidic matK and nuclear Chs sequences. *Am J Bot* 88:534-544.
- Korf, I. 2004. Gene finding in novel genomes. *BMC bioinformatics* 5:59.
- Langmead, B., and S. L. Salzberg. 2012. Fast gapped-read alignment with Bowtie 2. *Nature methods* 9:357-359.
- Li, H. 2013. Aligning sequence reads, clone sequences and assembly contigs with BWA-MEM. *arXiv* 1303.3997v1.
- Nordberg, H., M. Cantor, S. Dusheyko, S. Hua, A. Poliakov, I. Shabalov, T. Smirnova, I. V. Grigoriev, and I. Dubchak. 2013. The genome portal of the Department of Energy Joint Genome Institute: 2014 updates. *Nucleic acids research* 42:D26-D31.
- Paradis, E., J. Claude, and K. Strimmer. 2004. APE: Analyses of Phylogenetics and Evolution in R language. *Bioinformatics* 20:289-290.
- Parra, G., K. Bradnam, and I. Korf. 2007. CEGMA: a pipeline to accurately annotate core genes in eukaryotic genomes. *Bioinformatics* 23:1061-1067.
- Quevillon, E., V. Silventoinen, S. Pillai, N. Harte, N. Mulder, R. Apweiler, and R. Lopez. 2005. InterProScan: protein domains identifier. *Nucleic acids research* 33:W116-W120.
- Rastas, P., F. C. F. Calboli, B. C. Guo, T. Shikano, and J. Merila. 2016. Construction of Ultradense Linkage Maps with Lep-MAP2: Stickleback F-2 Recombinant Crosses as an Example. *Genome Biol Evol* 8:78-93.
- Simao, F. A., R. M. Waterhouse, P. Ioannidis, E. V. Kriventseva, and E. M. Zdobnov. 2015. BUSCO: assessing genome assembly and annotation completeness with single-copy orthologs. *Bioinformatics* 31:3210-3212.
- Sobel, J. M., and M. A. Streisfeld. 2015. Strong premating reproductive isolation drives incipient speciation in *Mimulus aurantiacus*. *Evolution* 69:447-461.
- Stanke, M., and S. Waack. 2003. Gene prediction with a hidden Markov model and a new intron submodel. *Bioinformatics* 19:li215-li225.



- Stankowski, S., J. M. Sobel, and M. A. Streisfeld. 2017. Geographic cline analysis as a tool for studying genome-wide variation: a case study of pollinator-mediated divergence in a monkeyflower. *Mol Ecol* 26:107-122.
- Streisfeld, M. A., W. N. Young, and J. M. Sobel. 2013. Divergent Selection Drives Genetic Differentiation in an R2R3-MYB Transcription Factor That Contributes to Incipient Speciation in *Mimulus aurantiacus*. *Plos Genet* 9.
- Zerbino, D. R., and E. Birney. 2008. Velvet: Algorithms for de novo short read assembly using de Bruijn graphs. *Genome Res* 18:821-829.

## Supplementary tables

**Table S1. Summary of the genetic linkage map constructed using an F2 intercross between the red and yellow ecotypes of subspecies *puniceus*.** The table includes map length in cM for each linkage group (LG), the number of markers associated with each LG, the number of unique map positions, and the average genetic distance in cM between each unique map position. Standard deviations are given in parentheses.

| <b>LG</b>   | <b>Map length (cM)</b> | <b>Number of markers</b> | <b>Unique map positions</b> | <b>Avg. genetic dist. between unique markers in cM (sd)</b> |
|-------------|------------------------|--------------------------|-----------------------------|-------------------------------------------------------------|
| <b>1</b>    | 93.9                   | 969                      | 335                         | 0.28 (0.33)                                                 |
| <b>2</b>    | 71.37                  | 893                      | 253                         | 0.28 (0.88)                                                 |
| <b>3</b>    | 76.3                   | 912                      | 256                         | 0.30 (0.65)                                                 |
| <b>4</b>    | 70.2                   | 851                      | 257                         | 0.28 (0.41)                                                 |
| <b>5</b>    | 78.7                   | 778                      | 295                         | 0.27 (0.29)                                                 |
| <b>6</b>    | 69.1                   | 741                      | 247                         | 0.28 (0.88)                                                 |
| <b>7</b>    | 59.8                   | 738                      | 234                         | 0.26 (0.33)                                                 |
| <b>8</b>    | 65.6                   | 674                      | 246                         | 0.27 (0.41)                                                 |
| <b>9</b>    | 68.6                   | 623                      | 182                         | 0.37 (0.58)                                                 |
| <b>10</b>   | 71.1                   | 410                      | 150                         | 0.48 (0.96)                                                 |
| <b>Avg.</b> | 72.74 (8.69)           | 758.90 (155.75)          | 245.50 (49.04)              | 0.31 (0.06)                                                 |

**Table S2. Analysis of gene space completeness in the *M. aurantiacus* genome using CEGMA and BUSCO.** The number and percent of core genes found in the final assembly are shown for each analysis (CEGMA,  $n = 248$ ; BUSCO,  $n = 1440$ ).

| <b>Analysis</b>                          | <b># Genes</b> | <b>% Found in Assembly</b> |
|------------------------------------------|----------------|----------------------------|
| <b>CEGMA Complete</b>                    | 233            | 93.95                      |
| <b>CEGMA Partial</b>                     | 244            | 98.39                      |
| <b>BUSCO total complete (duplicated)</b> | 1340 (61)      | 93 (4.2)                   |
| <b>BUSCO Fragmented</b>                  | 29             | 2.0                        |
| <b>BUSCO Missing</b>                     | 71             | 5.0                        |

**Table S3. Sample information for the 37 sequenced samples.** Includes their taxon identity, sampling location, percent read alignment, and total sequencing depth.

| Sample | Taxon                         | Latitude | Longitude | % Reads aligned | Seq. Depth |
|--------|-------------------------------|----------|-----------|-----------------|------------|
| 159_83 | <i>ssp. aridus</i>            | 32.6630  | -116.2230 | 91.7            | 21.12      |
| 159_84 | <i>ssp. aridus</i>            | 32.6630  | -116.2230 | 89.3            | 21.98      |
| 195_1  | <i>ssp. aridus</i>            | 32.6300  | -116.1429 | 92.6            | 20.20      |
| T84    | <i>ssp. aridus</i>            | 32.6526  | -116.2449 | 87.2            | 21.75      |
| T102   | <i>ssp. aurantiacus</i>       | 39.0424  | -122.7727 | 94.9            | 23.74      |
| T104   | <i>ssp. aurantiacus</i>       | 39.2045  | -123.7646 | 94.6            | 25.09      |
| T50    | <i>ssp. aurantiacus</i>       | 35.9865  | -121.4928 | 88.3            | 24.36      |
| T92    | <i>ssp. aurantiacus</i>       | 37.8459  | -120.6110 | 94.0            | 15.16      |
| T144   | <i>ssp. calycinus</i>         | 34.1929  | -117.2784 | 93.2            | 26.00      |
| T150   | <i>ssp. calycinus</i>         | 33.8564  | -116.8481 | 94.7            | 24.02      |
| T90    | <i>ssp. calycinus</i>         | 35.5918  | -118.5052 | 91.3            | 19.97      |
| T91    | <i>ssp. calycinus</i>         | 35.3172  | -118.5871 | 95.5            | 27.91      |
| T101   | <i>ssp. grandiflorus</i>      | 39.5536  | -121.4301 | 92.0            | 16.05      |
| T61    | <i>ssp. grandiflorus</i>      | 39.5590  | -120.8243 | 91.6            | 17.31      |
| T96    | <i>ssp. grandiflorus</i>      | 39.0122  | -120.7552 | 92.0            | 28.21      |
| T99    | <i>ssp. grandiflorus</i>      | 39.4376  | -121.0599 | 91.4            | 23.84      |
| DPR    | <i>ssp. longiflorus</i>       | 33.7459  | -117.4485 | 96.0            | 26.88      |
| SS     | <i>ssp. longiflorus</i>       | 34.2722  | -118.6100 | 94.2            | 30.86      |
| T33    | <i>ssp. longiflorus</i>       | 34.3438  | -118.5099 | 94.6            | 18.87      |
| T8     | <i>ssp. longiflorus</i>       | 34.1347  | -118.6452 | 82.6            | 25.11      |
| KK168  | <i>ssp. parviflorus</i>       | 34.0180  | -119.6730 | 91.8            | 23.66      |
| KK161  | <i>ssp. parviflorus</i>       | 34.0180  | -119.6730 | 92.0            | 19.11      |
| KK180  | <i>ssp. parviflorus</i>       | 34.0180  | -119.6730 | 92.4            | 18.18      |
| KK182  | <i>ssp. parviflorus</i>       | 34.0193  | -119.6802 | 91.3            | 19.46      |
| ELF    | <i>ssp. puniceus</i> , red    | 33.0860  | -117.1453 | 93.0            | 18.20      |
| JMC    | <i>ssp. puniceus</i> , red    | 32.7373  | -116.9541 | 93.8            | 19.06      |
| LH     | <i>ssp. puniceus</i> , red    | 33.0609  | -117.1188 | 87.1            | 19.77      |
| MT     | <i>ssp. puniceus</i> , red    | 32.8210  | -117.0618 | 93.7            | 20.85      |
| UCSD   | <i>ssp. puniceus</i> , red    | 32.8894  | -117.2362 | 87.0            | 18.23      |
| BCRD   | <i>ssp. puniceus</i> , yellow | 32.9496  | -116.6380 | 94.6            | 20.85      |
| INJ    | <i>ssp. puniceus</i> , yellow | 33.0979  | -116.6643 | 93.1            | 18.83      |
| LO     | <i>ssp. puniceus</i> , yellow | 32.6767  | -116.3312 | 93.4            | 18.04      |
| PCT    | <i>ssp. puniceus</i> , yellow | 32.7326  | -116.4698 | 92.3            | 19.68      |
| POTR   | <i>ssp. puniceus</i> , yellow | 32.6038  | -116.6339 | 90.5            | 19.27      |
| CLV_GH | <i>M. clevelandii</i>         | 33.1589  | -116.8122 | 92.3            | 21.31      |
| CLV_11 | <i>M. clevelandii</i>         | 33.3391  | -116.9325 | 84.4            | 15.52      |
| CLV_4  | <i>M. clevelandii</i>         | 33.3391  | -116.9325 | 89.3            | 17.31      |

**Table S4. Loadings for principal component 1 calculated across all 36 pairwise comparisons (for  $F_{ST}$  and  $d_{xy}$ ) or all nine taxa (for  $\pi$ )**

| <b>Comparison</b> | <b><math>F_{ST}</math> PC1</b> | <b><math>d_{xy}</math> PC1</b> | <b>Taxon</b> | <b><math>\pi</math> PC1</b> |
|-------------------|--------------------------------|--------------------------------|--------------|-----------------------------|
| AUR_ARI           | 0.85707                        | 0.95575                        | ARI          | 0.9251                      |
| BIF_ARI           | 0.89606                        | 0.86182                        | AUR          | 0.86508                     |
| CAL_ARI           | 0.88738                        | 0.95423                        | AUS          | 0.97255                     |
| CLV_ARI           | 0.8969                         | 0.39278                        | BIF          | 0.77181                     |
| FLE_ARI           | 0.85342                        | 0.94563                        | CAL          | 0.96734                     |
| LON_ARI           | 0.9046                         | 0.96057                        | CLV          | 0.92017                     |
| AUR_BIF           | 0.81191                        | 0.85563                        | FLE          | 0.91044                     |
| AUR_CAL           | 0.32407                        | 0.90376                        | LON          | 0.95166                     |
| AUR_CLV           | 0.90725                        | 0.46698                        |              |                             |
| AUR_FLE           | 0.79434                        | 0.94778                        |              |                             |
| LON_AUR           | 0.40962                        | 0.90381                        |              |                             |
| ARI_AUS           | 0.90097                        | 0.94262                        |              |                             |
| AUR_AUS           | 0.451                          | 0.90512                        |              |                             |
| BIF_AUS           | 0.91203                        | 0.90305                        |              |                             |
| CAL_AUS           | 0.49255                        | 0.88634                        |              |                             |
| CLV_AUS           | 0.90576                        | 0.54264                        |              |                             |
| FLE_AUS           | 0.86511                        | 0.94318                        |              |                             |
| LON_AUS           | 0.59046                        | 0.88521                        |              |                             |
| CAL_BIF           | 0.89043                        | 0.88319                        |              |                             |
| CLV_BIF           | 0.91181                        | 0.32045                        |              |                             |
| FLE_BIF           | 0.89579                        | 0.86769                        |              |                             |
| LON_BIF           | 0.88549                        | 0.89344                        |              |                             |
| CAL_FLE           | 0.83543                        | 0.94124                        |              |                             |
| LON_CAL           | 0.3786                         | 0.87337                        |              |                             |
| CAL_CLV           | 0.90548                        | 0.52607                        |              |                             |
| FLE_CLV           | 0.91991                        | 0.45233                        |              |                             |
| LON_CLV           | 0.90738                        | 0.51482                        |              |                             |
| LON_FLE           | 0.84197                        | 0.94507                        |              |                             |
| PUN_ARI           | 0.90783                        | 0.94574                        |              |                             |
| PUN_AUR           | 0.51788                        | 0.89861                        |              |                             |
| PUN_AUS           | 0.51423                        | 0.84798                        |              |                             |
| PUN_BIF           | 0.91936                        | 0.90695                        |              |                             |
| PUN_CAL           | 0.62051                        | 0.88316                        |              |                             |
| PUN_CLV           | 0.90758                        | 0.55149                        |              |                             |
| PUN_FLE           | 0.87615                        | 0.93825                        |              |                             |
| PUN_LON           | 0.66912                        | 0.88264                        |              |                             |

**Table S5. Details for the linear regressions presented in Figure 4 of the main text.**

| <b>Variables</b>      | <b>Pearson's r</b> | <b>Regression equation</b> | <b><i>p</i></b> |
|-----------------------|--------------------|----------------------------|-----------------|
| $d_{xy}$ & $\pi$      | -0.93              | $y = -60.5x + 1.33$        | < 0.001         |
| $\pi$ & gene count    | 0.59               | $y = 3.9x - 0.85$          | 0.130           |
| $\pi$ & cM/mbp        | -0.79              | $y = -5.4x + 0.46$         | 0.020           |
| $F_{ST}$ & $\pi$      | -0.89              | $y = -53.3x - 0.13$        | 0.003           |
| $F_{ST}$ & gene count | 0.81               | $y = 46.5x + 0.04$         | 0.016           |
| $F_{ST}$ cM/mbp       | -0.73              | $y = -25.5x + 0.01$        | 0.041           |

## Supplementary figures

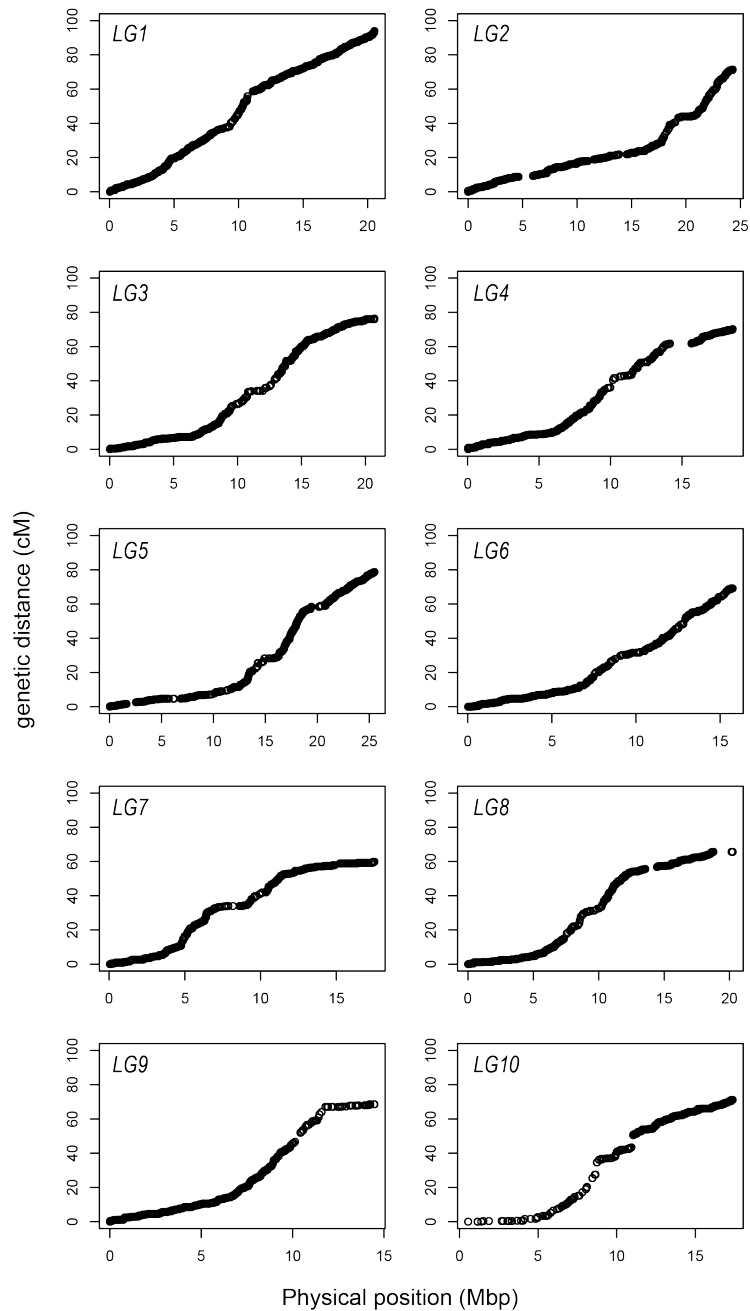

**Figure. S1. Map distance (cM/Mbp) vs. physical distance across the 10 linkage groups.** Recombination for each marker is estimated relative to the start of the linkage group and plotted at its physical location on each chromosome in the reference assembly.

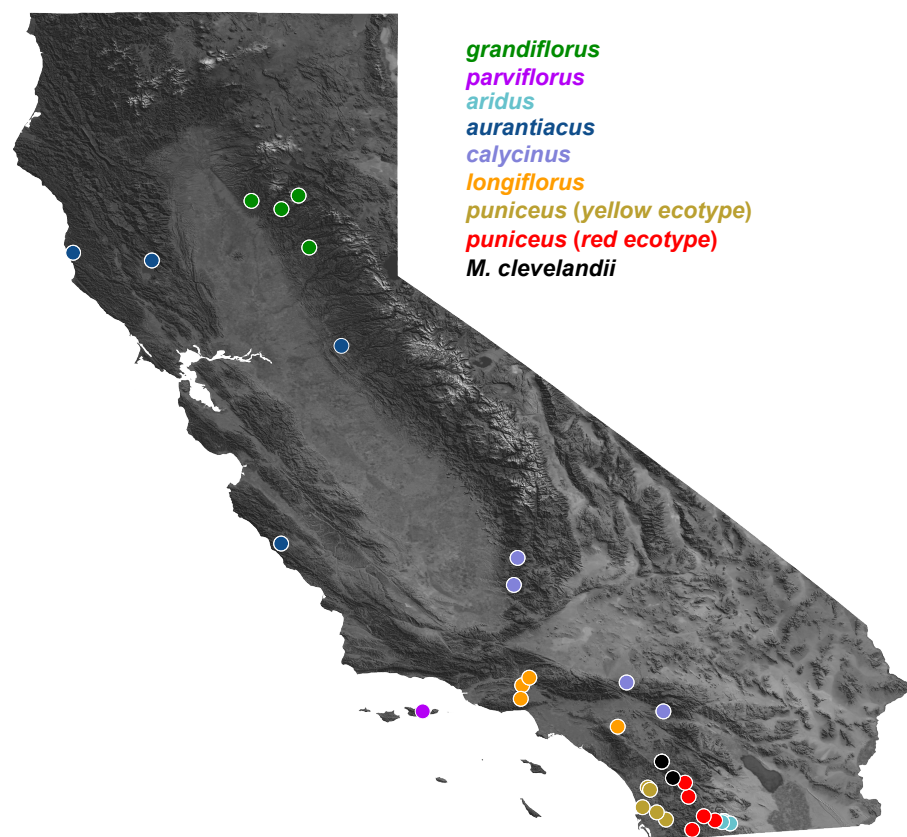

**Figure S2. Geographic distribution of sampling locations for each sample sequenced in this study.** Detailed position information for each population can be found in Table S3.



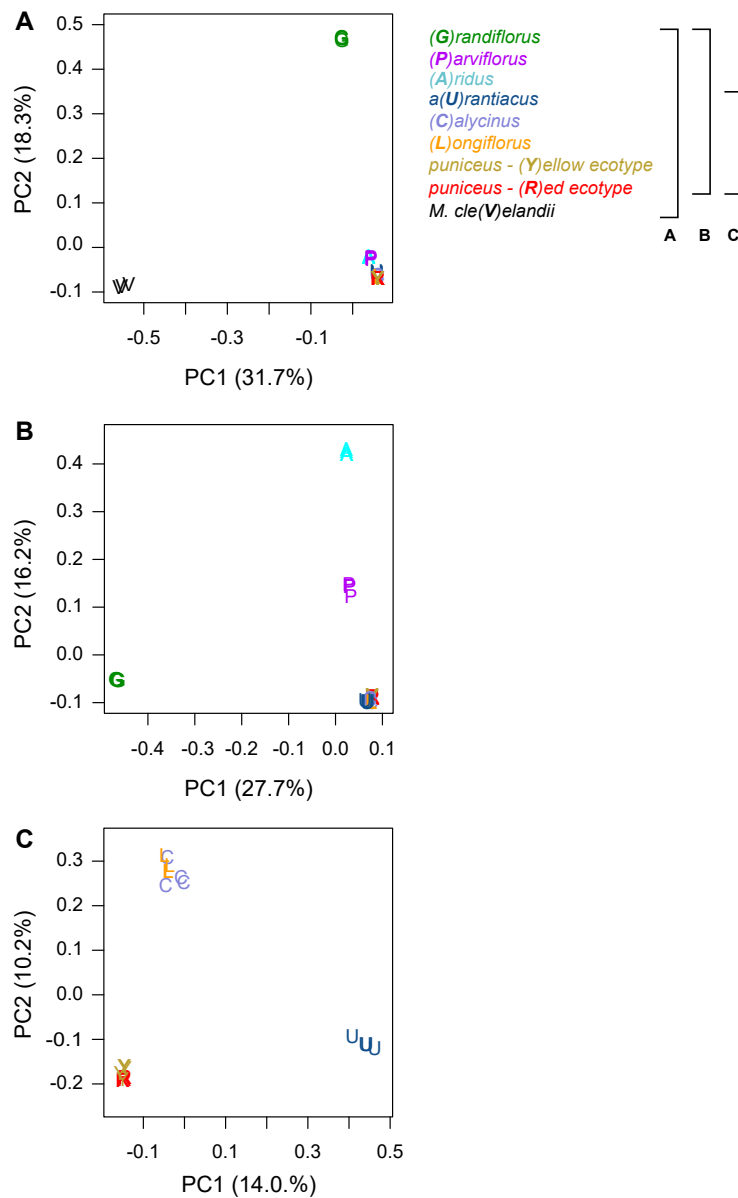

**Figure S3. Genome-wide Principal Components Analysis (PCA).** Each plot is a separate PCA performed using different sets of taxa. The legend to the right describes the set of taxa included in each analysis, with the capital letter in parentheses and the color representing the specific taxon. A) All taxa; B) all subspecies of *M. aurantiacus*, but excluding *M. clevelandii*; C) only subspecies *aurantiacus*, *longiflorus*, *calycinus*, and the red and yellow ecotypes of subspecies *puniceus*. The percent variation explained by each principal component is given in parentheses.

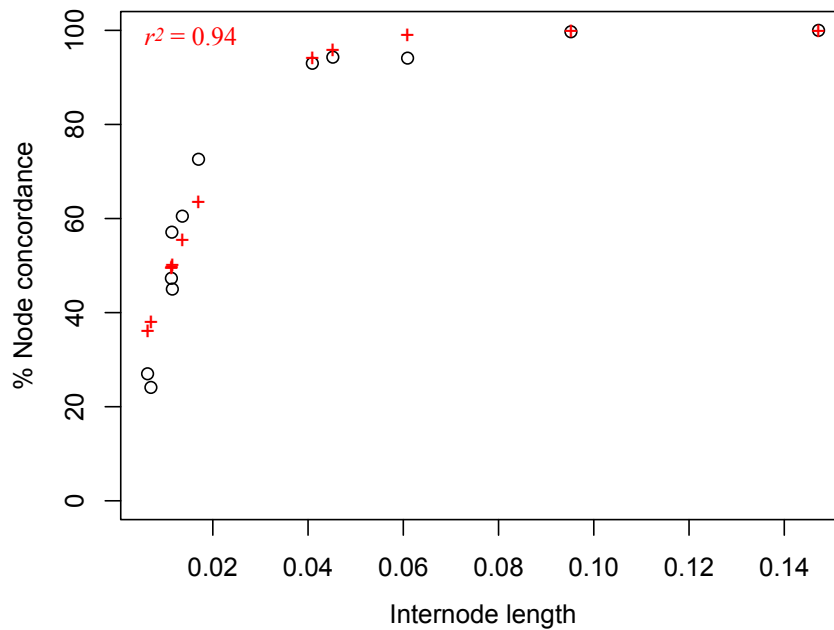

**Figure S4. Incomplete lineage sorting due to rapid diversification.** Clades separated by shorter internodes (i.e., separated by less time) are recovered less frequently in window-based trees (500 kb windows). This indicates a strong role for incomplete lineage sorting in areas of the tree where diversification is rapid. The % node concordance is the percentage of window-based of trees that contain a given node in the genome-wide tree, and is plotted against the length of the internode separating each clade. Only clades at and above the level of taxon were included. The red points are the predicted values from a 4-parameter logistic function fitted to the data using an iterative least-squares method.

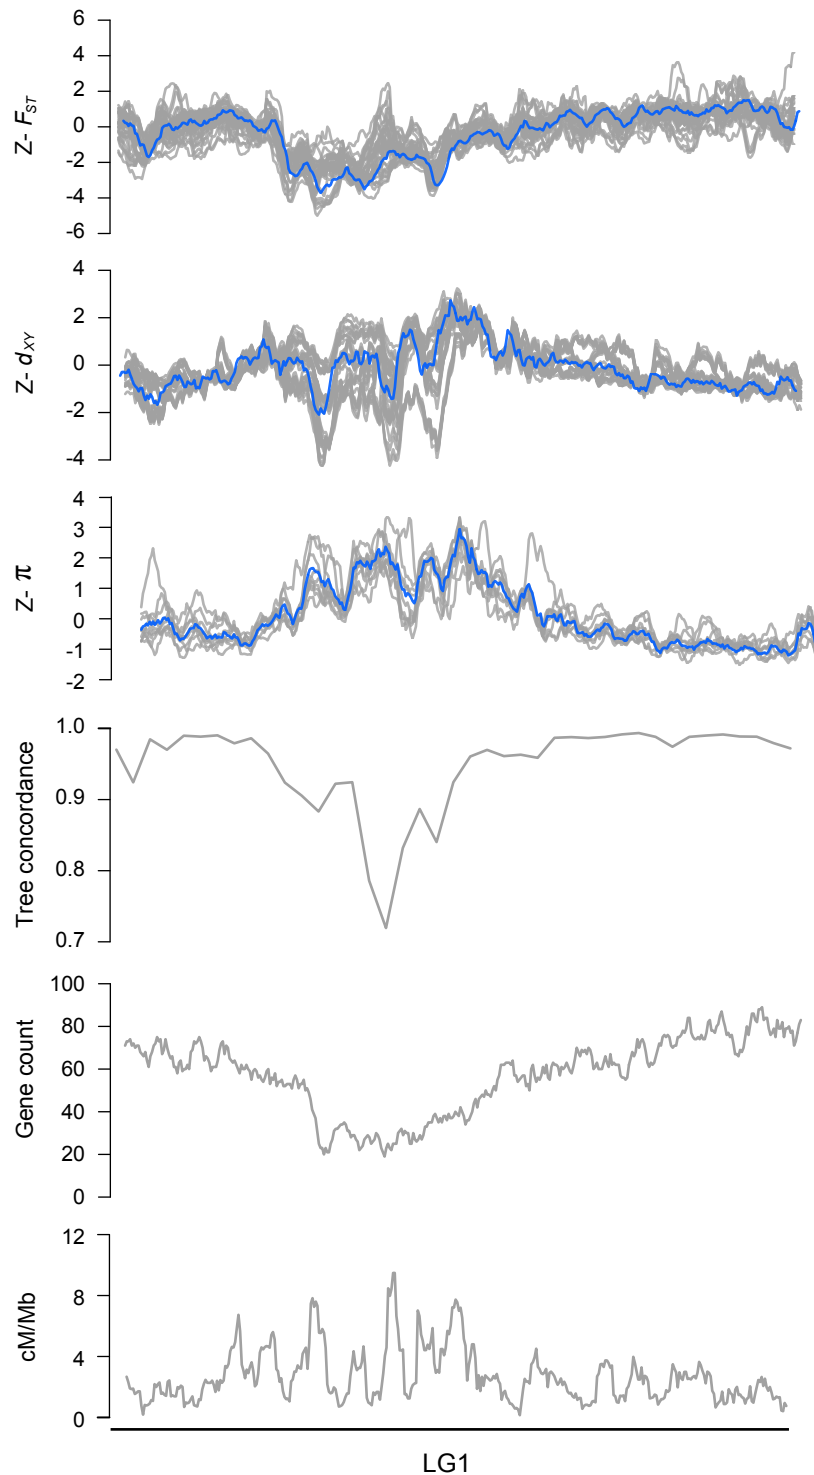

**Figure S5. Patterns of variation plotted across each bush monkeyflower linkage group.**

Z-transformed  $F_{ST}$ ,  $d_{xy}$ , and  $\pi$  in overlapping 500 kb windows (step size = 50 kbp). The gray lines are z-transformed scores for each of the 36 pairwise comparisons ( $F_{ST}$  and  $d_{xy}$ ) or nine taxa ( $\pi$ ), and the blue line is the z-transformed score for the first principal component (PC1). Estimates of tree concordance, gene count and recombination rate (cM/Mbp) are also shown.

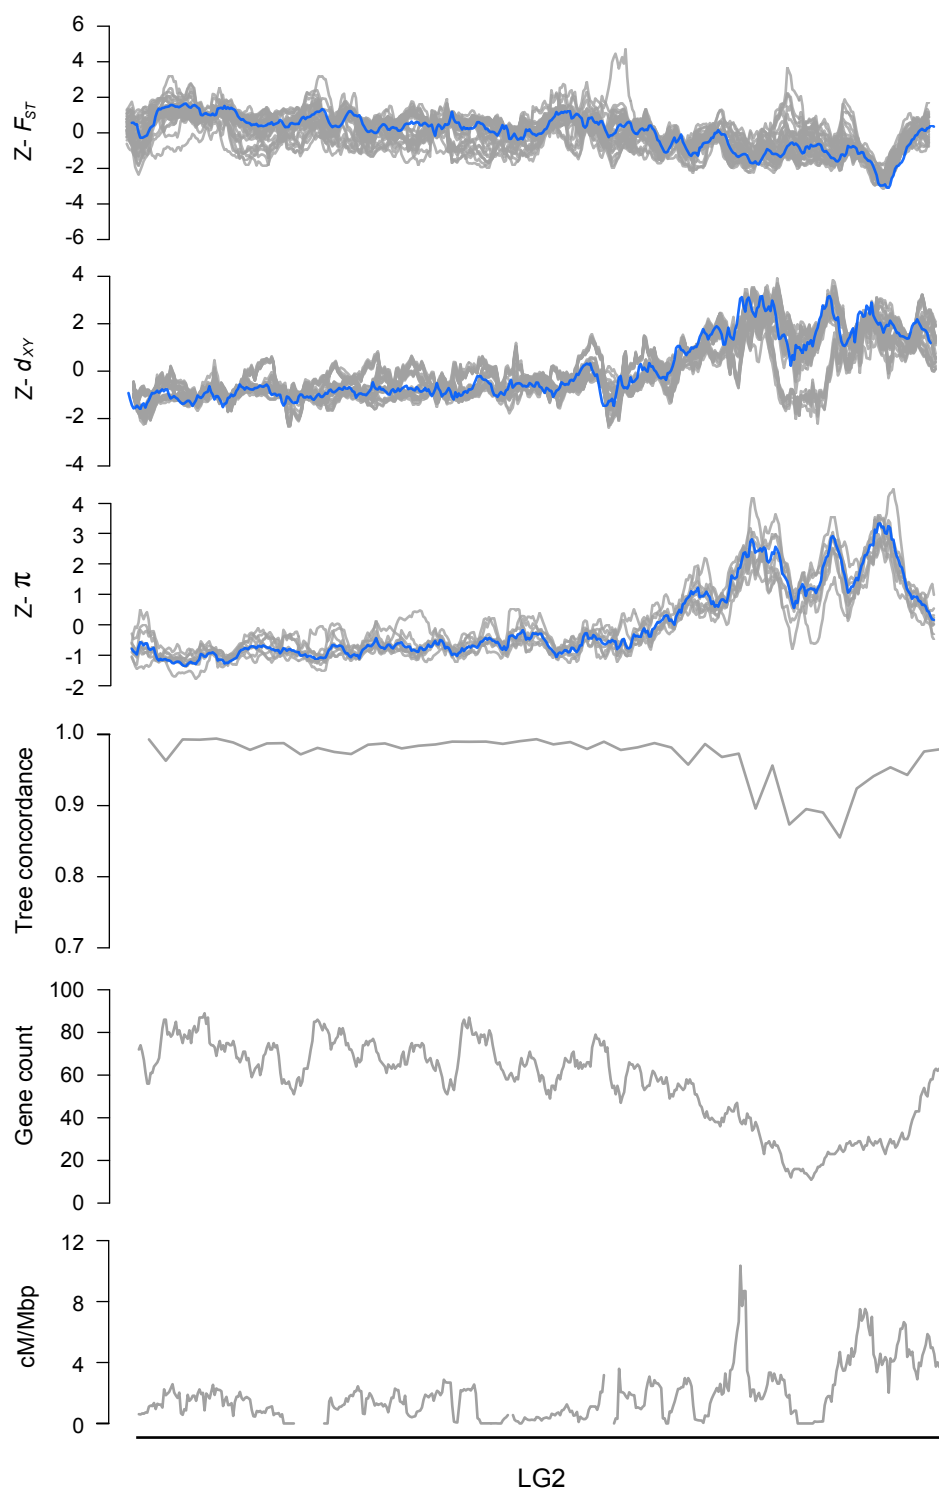

**Figure S5. continued**

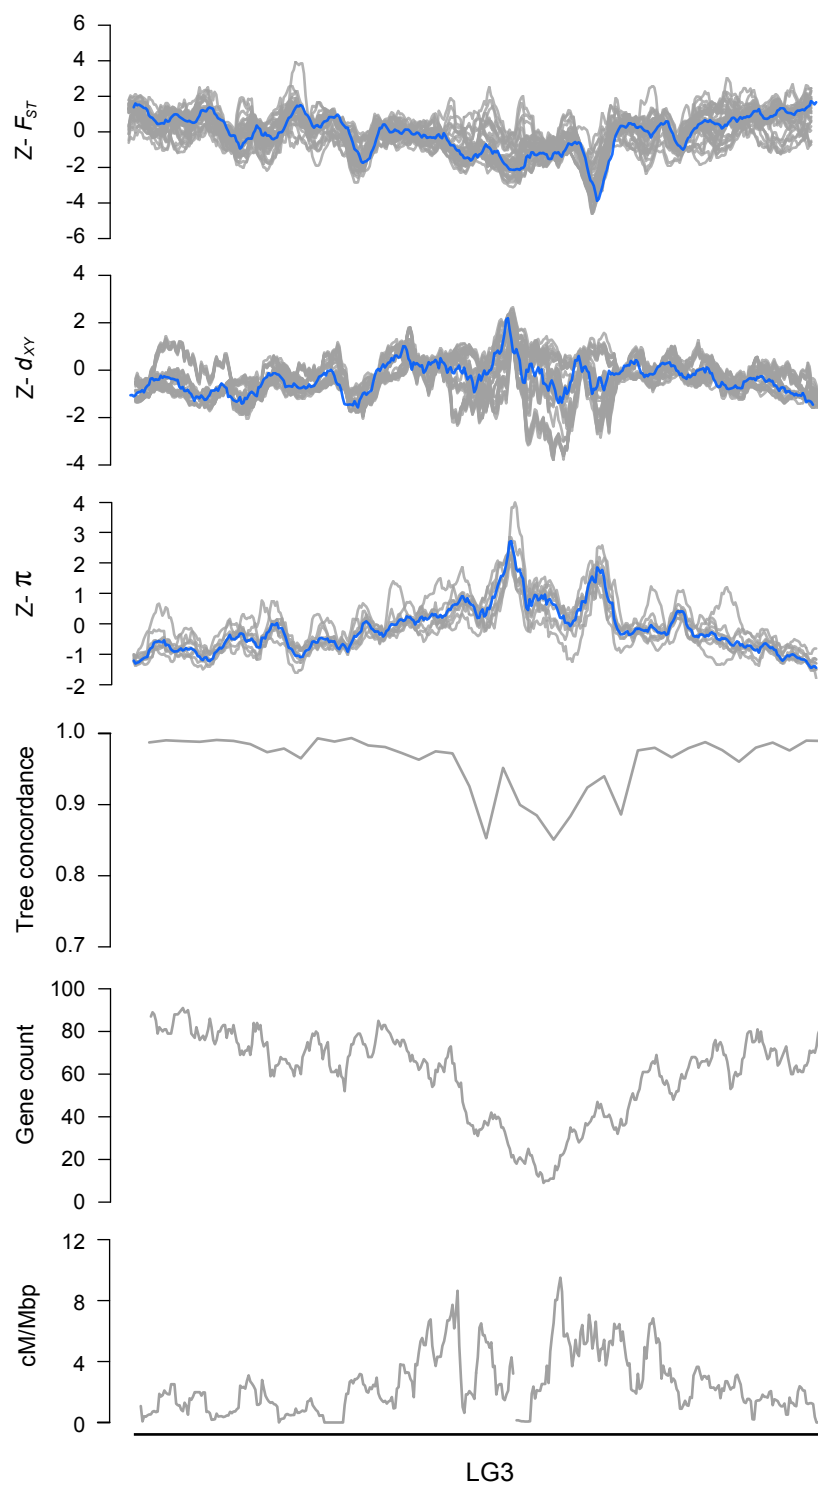

**Figure S5. continued**

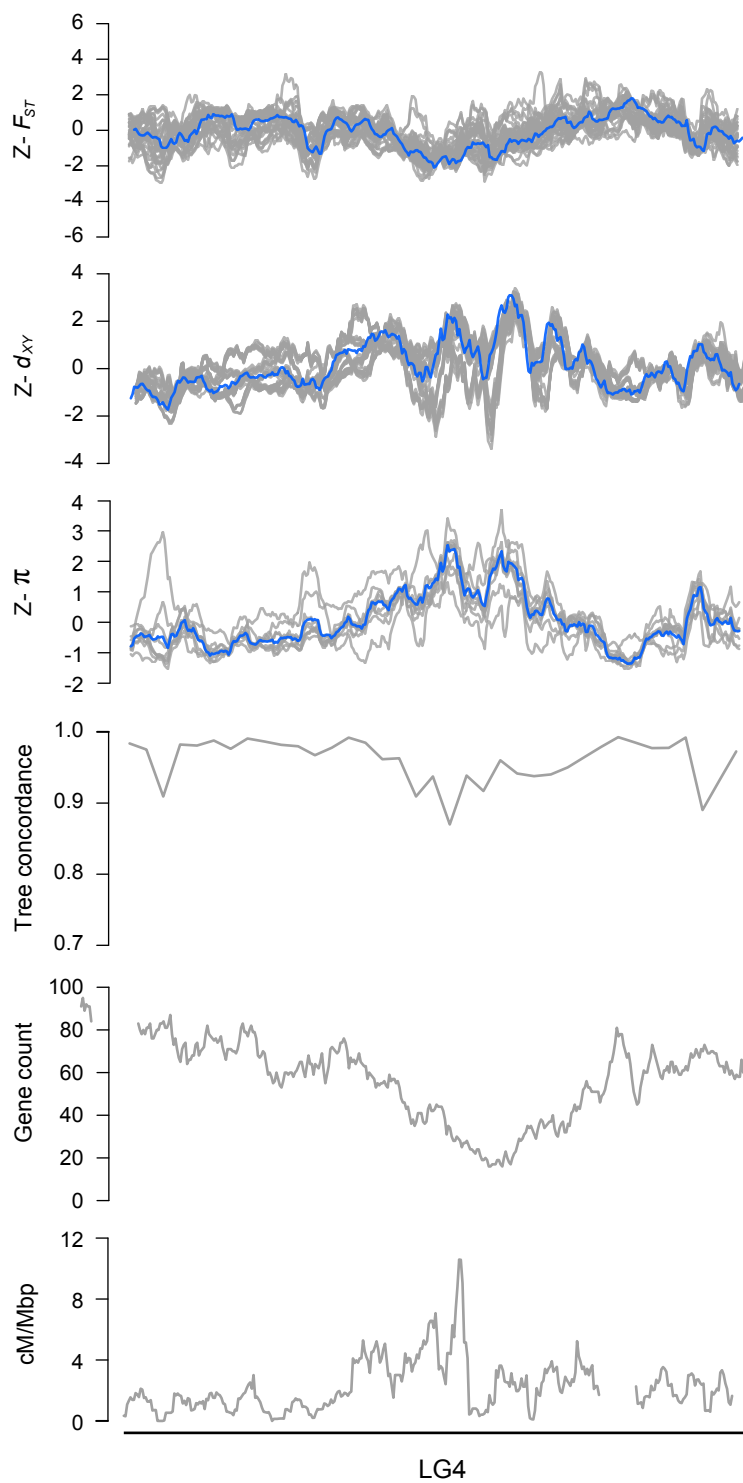

**Figure S5. continued**

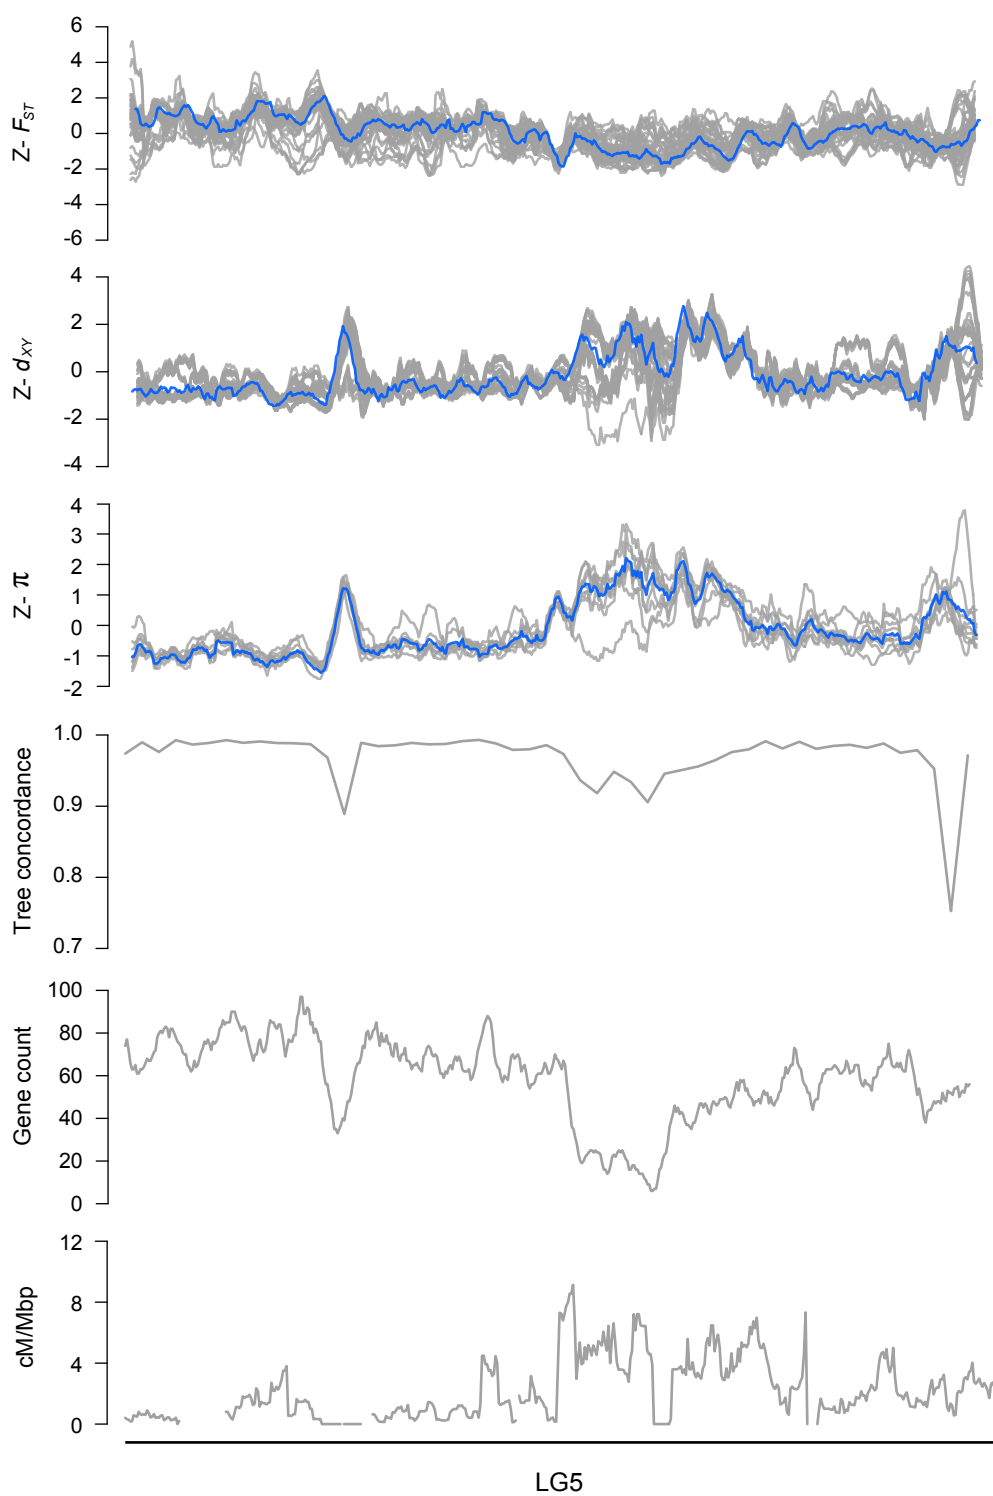

**Figure S5. continued**

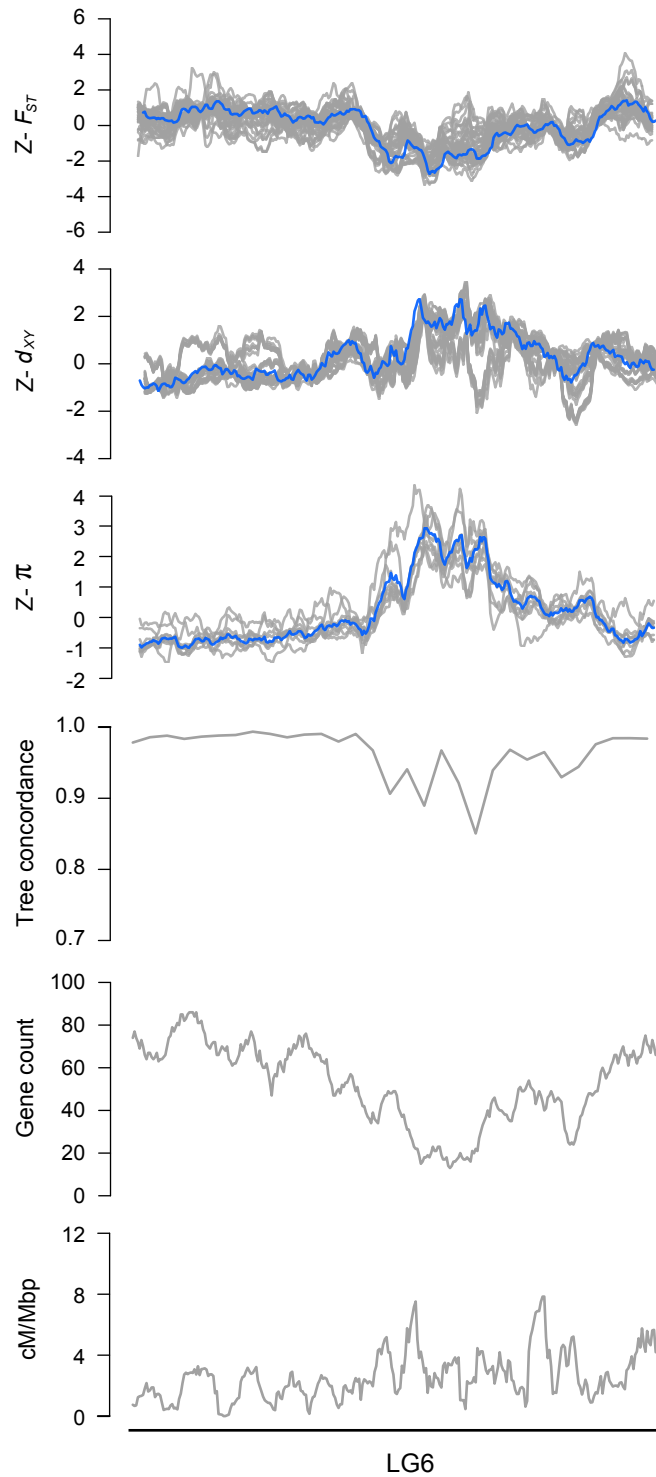

**Figure S5. continued**



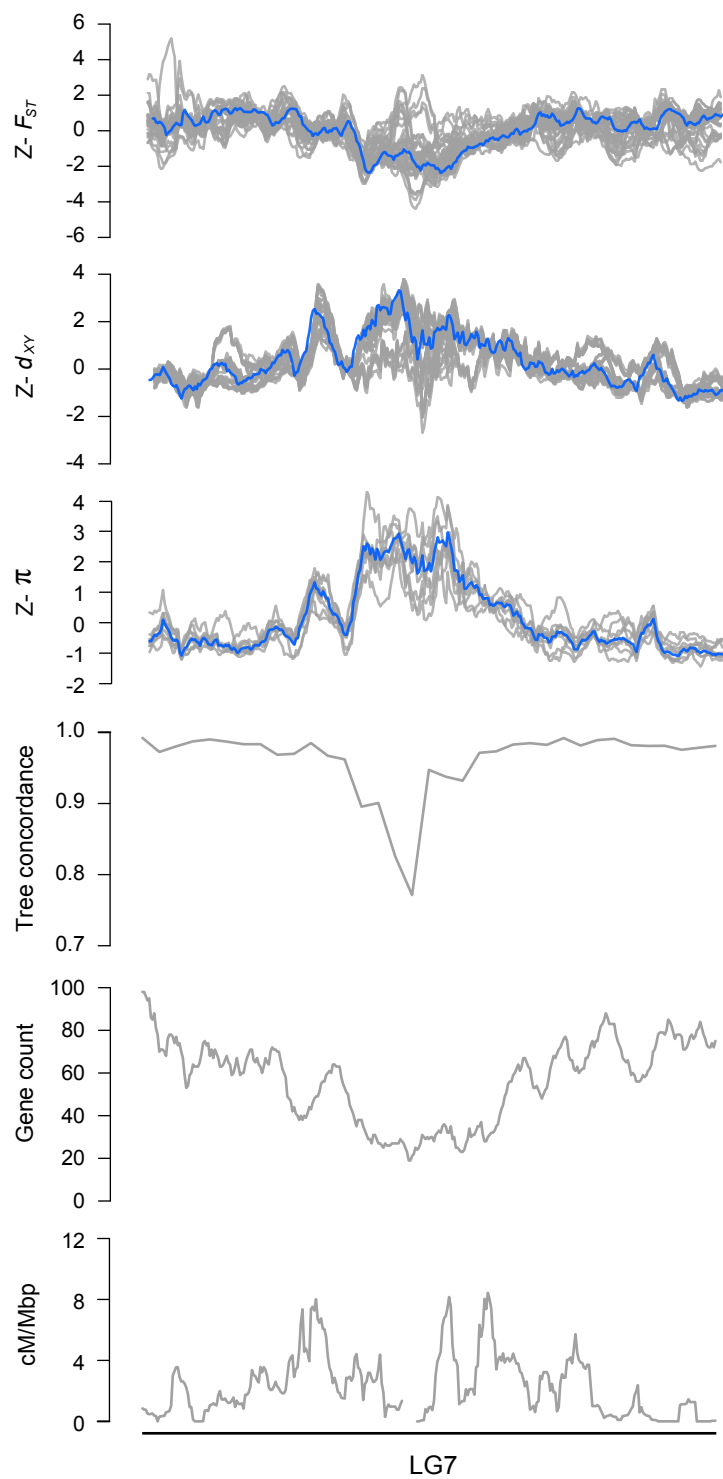

**Figure S5. continued**

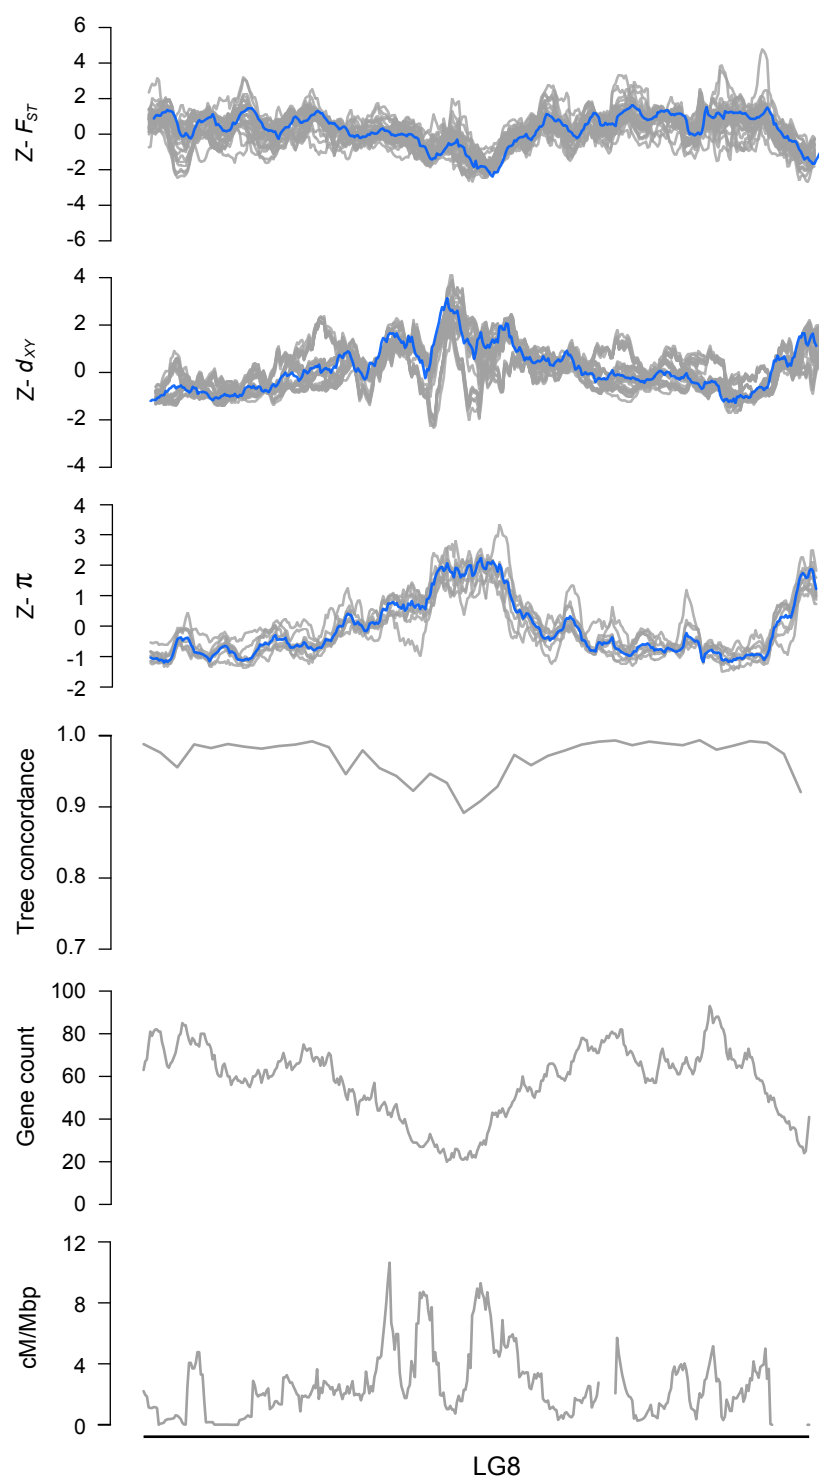

**Figure S5. continued**

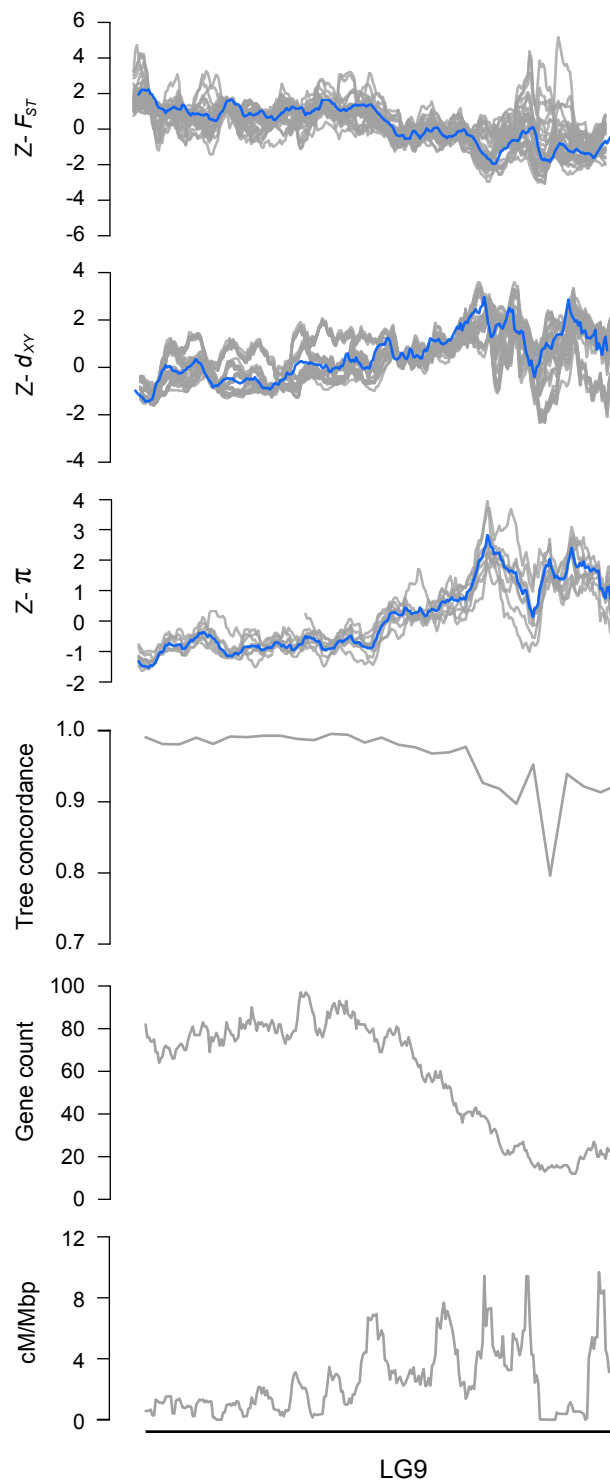

**Figure S5. continued**

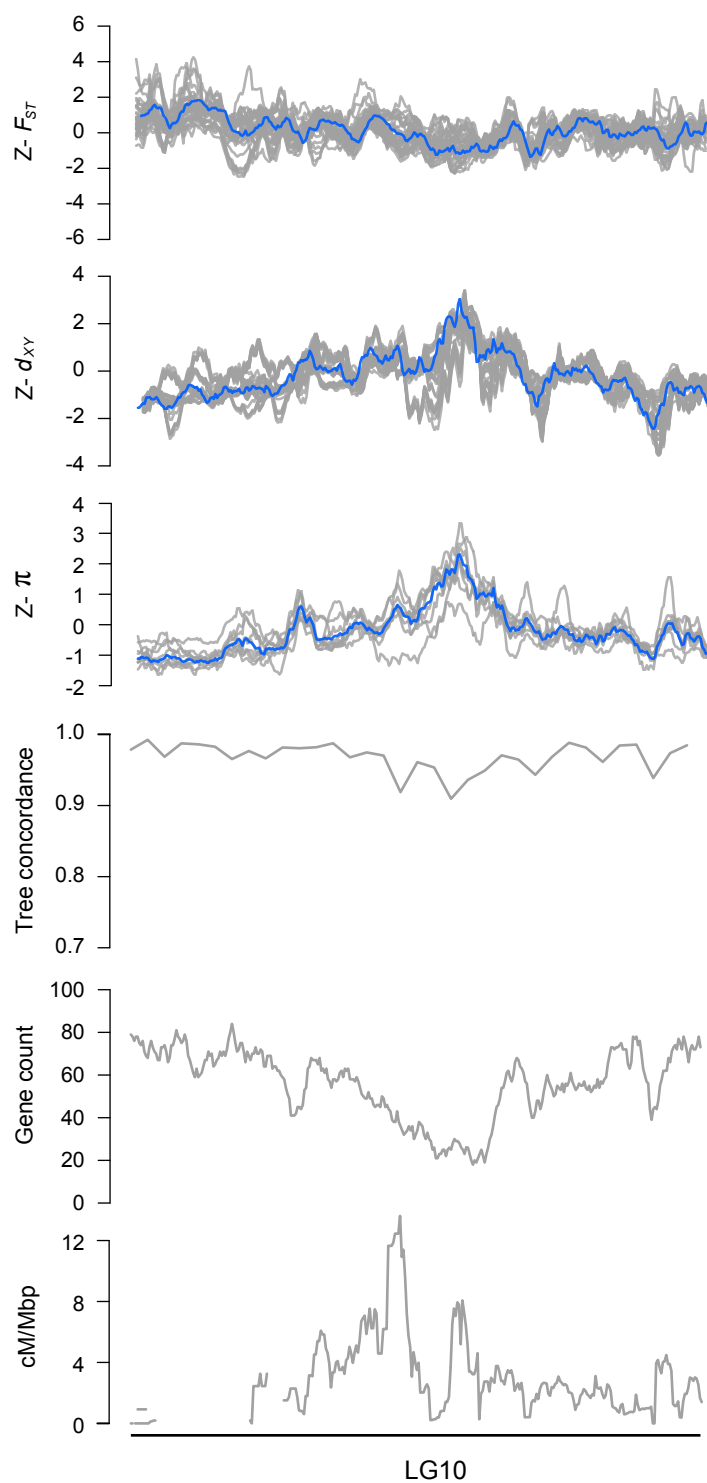

**Figure S5. continued**

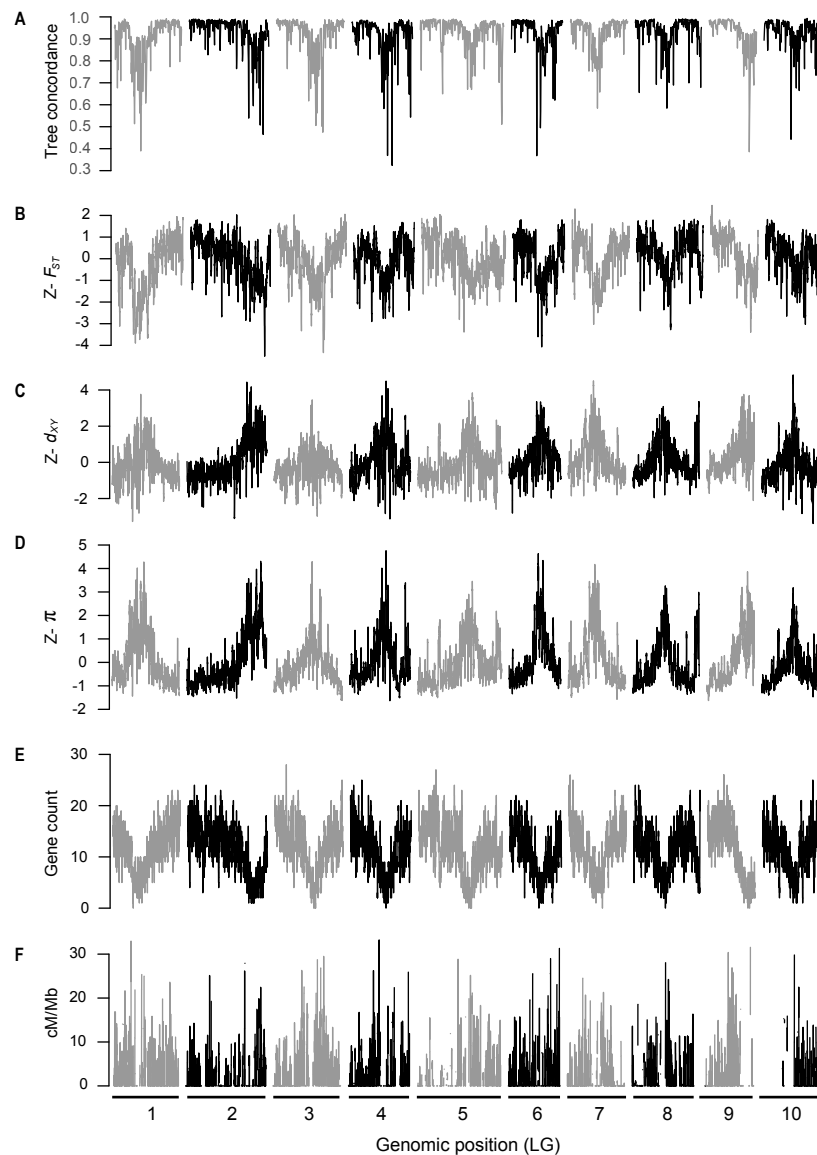

**Figure S6. Common patterns of genome-wide variation mirror variation in the local properties of the genome.** Plots are the same as in Fig. 2 of the main text, but for 100 kb windows (step size 10 kb). A) tree concordance; B-D) Z-transformed PC1 for  $F_{ST}$ ,  $d_{xy}$  and  $\pi$ , respectively; E) gene count; and F) recombination rate (cM/Mbp) are plotted across the 10 monkeyflower LGs.

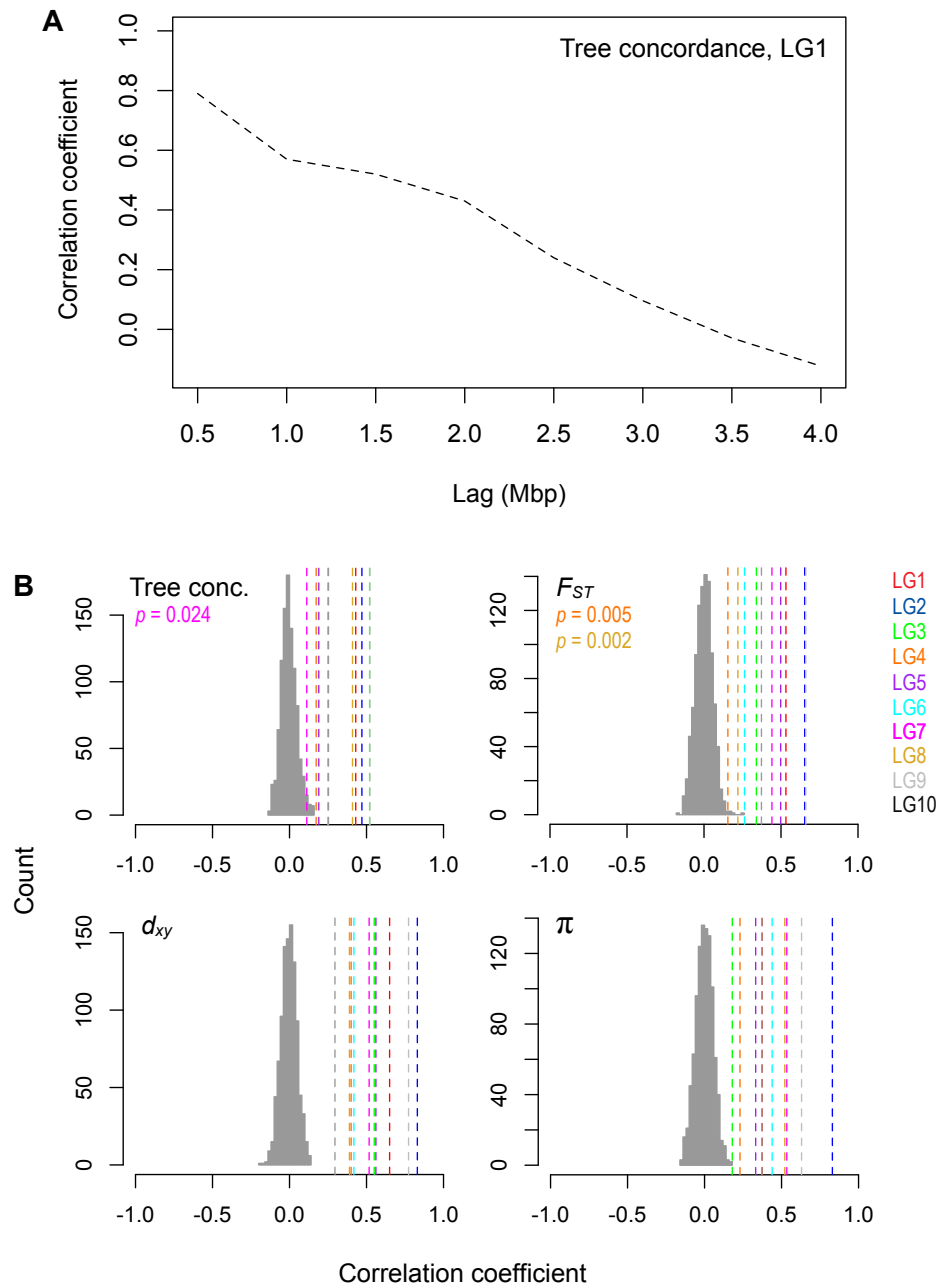

**Figure S7. Patterns of variation are non-randomly distributed across the genome.**

A) Strong Autocorrelation of tree concordance scores on LG1 over a Mbp scale. B) Levels of tree concordance,  $F_{ST}$ ,  $d_{xy}$ , and  $\pi$  all show significant autocorrelation at the 2 Mbp scale. The dashed vertical lines show the observed autocorrelation coefficients for each LG with a 2 Mbp lag. The histogram shows the null distribution of autocorrelation coefficients (same lag) generated from 1000 random permutations of the genome-wide values. The observed data are significant at  $p = 0.001$  unless stated otherwise.

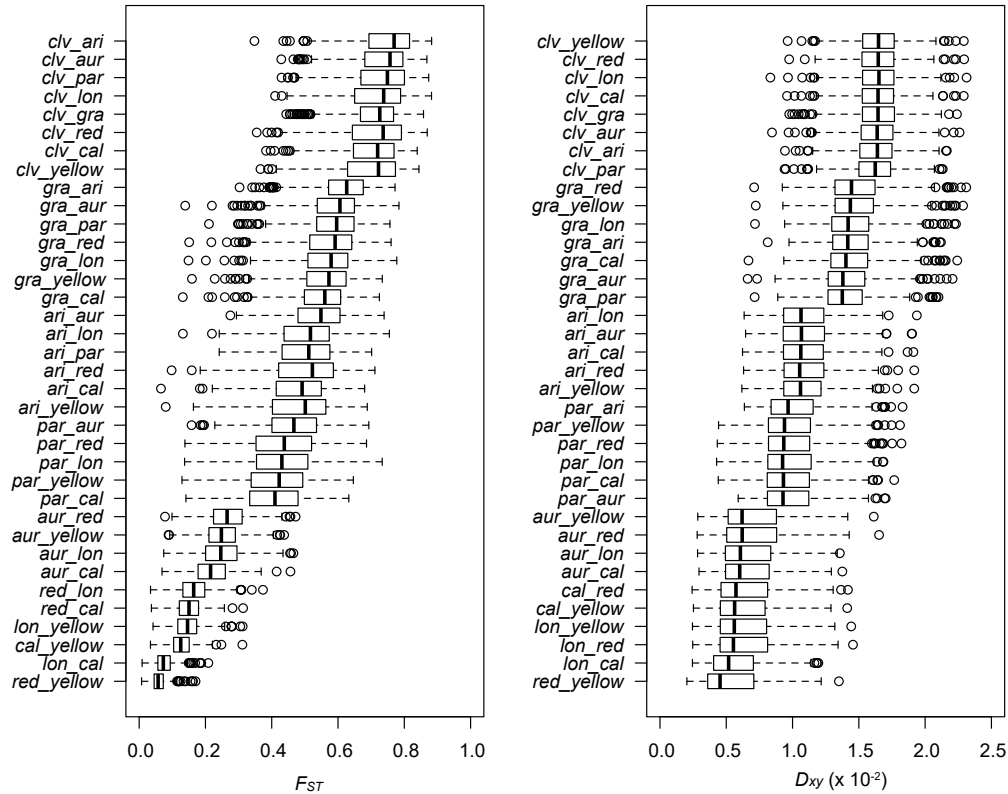

**Figure S8. Patterns of differentiation and divergence for all 36 pairs of taxa.** Box plots for each of the 36 pairwise taxonomic comparisons reveal the range of variation in  $F_{ST}$  and  $d_{xy}$  across the radiation. Moreover, the data show extensive variance among genomic windows within each comparison. Vertical black lines indicate the median, boxes represent the lower and upper quartiles, and whiskers extend to 1.5 times the interquartile range. Taxon abbreviations: *cal*, *calycinus*; *lon*, *longiflorus*; *aur*, *aurantiacus*; *par*, *parviflorus*; *ari*, *aridus*; *gra*, *grandiflorus*; *clv*, *M. clevelandii*.

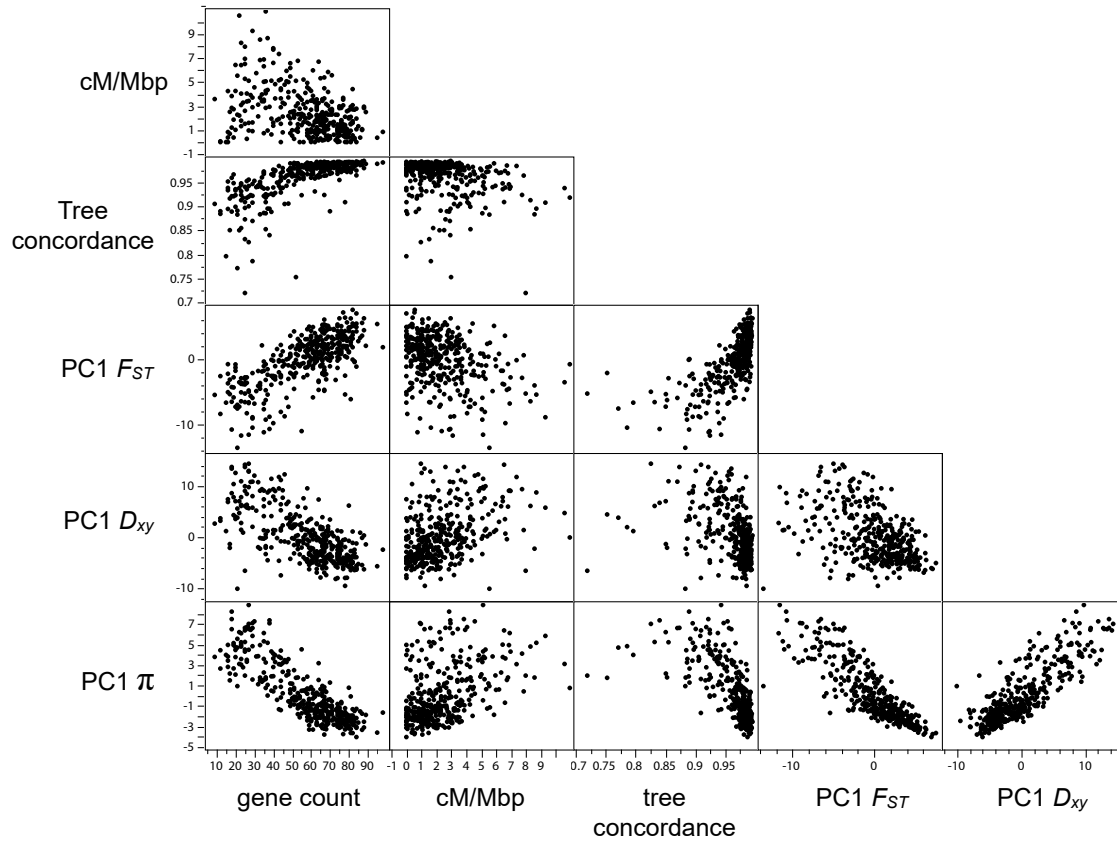

**Figure S9. Bivariate plots among measures of variation and genomic features across 500 kb genomic windows.** Note that this is the same as Figure 3 but with axes units. Also note that the axes are different across rows and columns of the matrix.



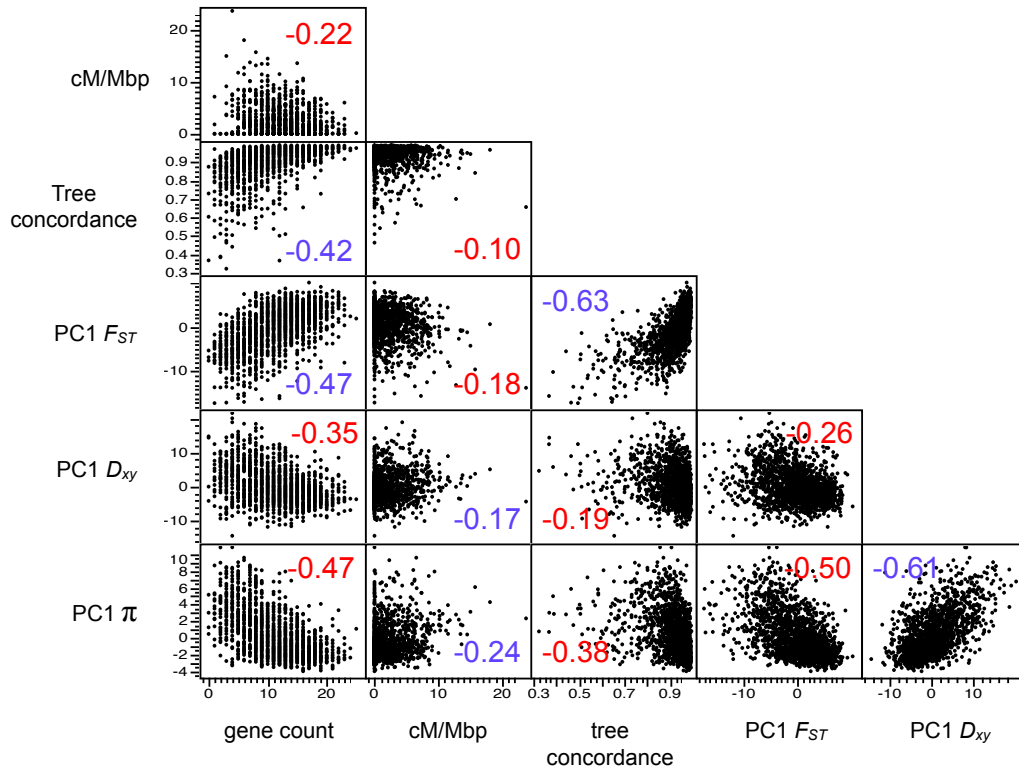

**Figure S10. Bivariate plots among measures of variation and genomic features across 100 kb genomic windows.** The number is the correlation coefficient. Positive correlation coefficients are colored blue and negative coefficients are colored red.

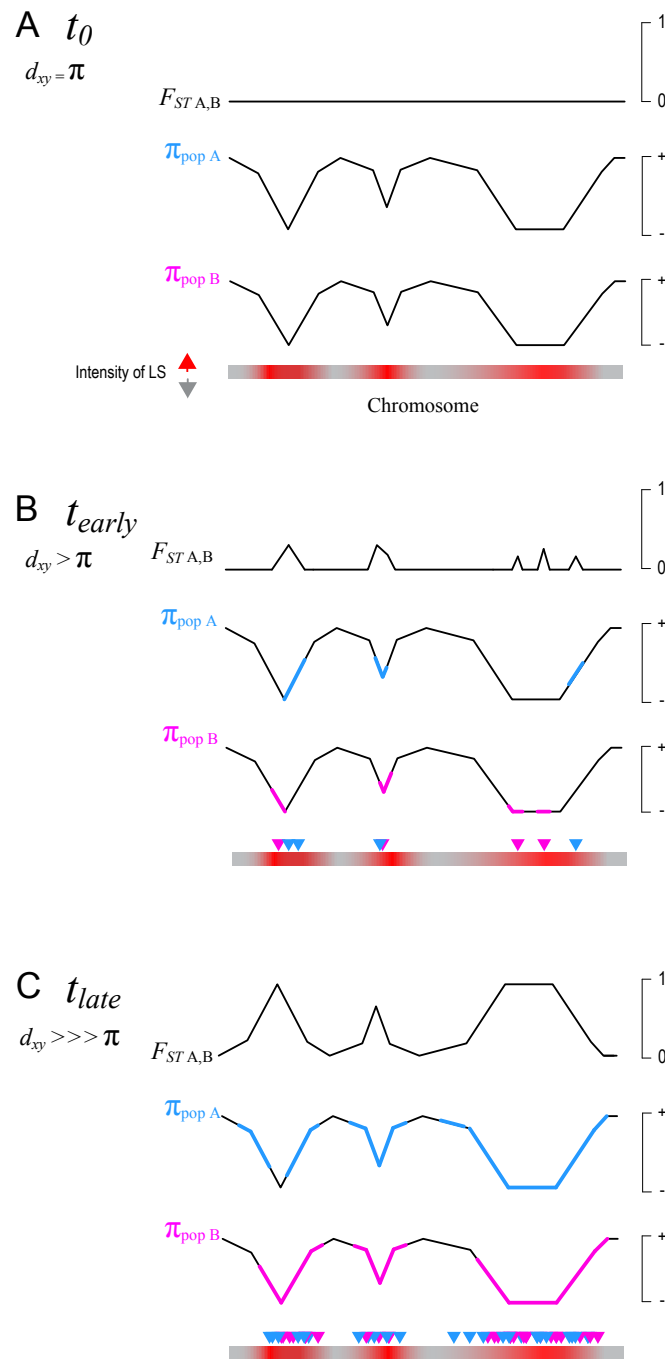

**Figure S11. A cartoon depicting the gradual build-up of a heterogeneous differentiation landscape by lineage-specific LS.** A) When a population first splits (allopatric divergence with large population sizes), patterns of genome-wide diversity ( $\pi$  pops A and B) are identical due to the complete sharing of ancestral variation among them. Thus, there is no pattern of heterogeneous differentiation between them. B) As time passes, LS begins to act separately within each lineage (LS events are indicated by arrows across the chromosome). This functions to maintain the diversity landscape in the face of new neutral mutations (affected areas in each lineage are shown in color) and also causes ancestral variants to be fixed among them. The result is an increase in  $F_{ST}$  in affected areas. C) Long after the split, many LS events have occurred in each lineage. Because the heterogeneous patterns of LS have been conserved since prior to the common ancestor of these taxa (redder areas of the chromosome experience a higher rate of LS), the affected areas are similar between the lineages. As a result, the diversity and differentiation landscapes come to perfectly mirror one another.

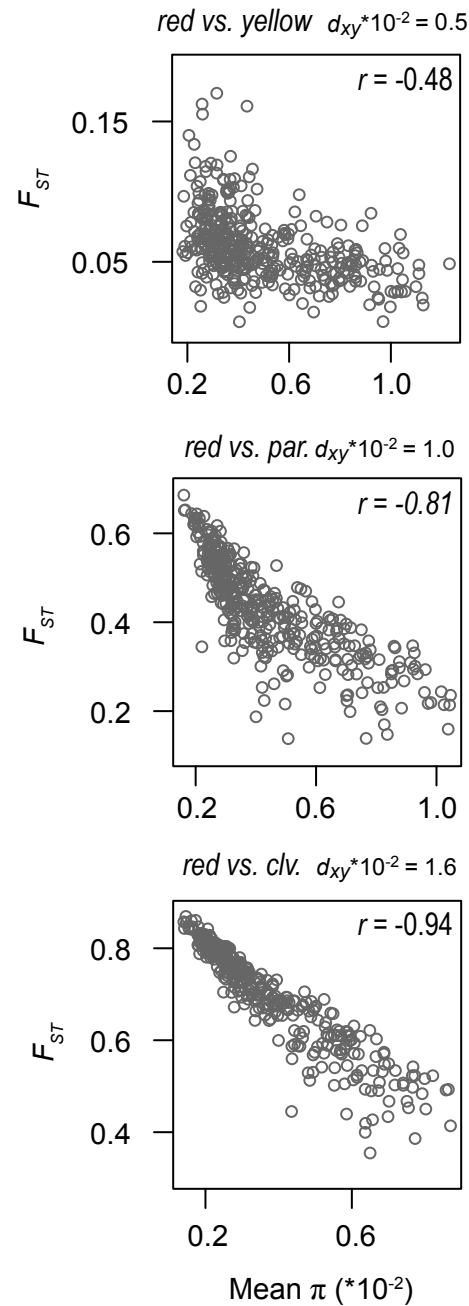

**Figure S12. Negative correlation between nucleotide diversity and differentiation becomes stronger with increasing divergence time.** A) Bivariate plots of the correlation between  $F_{ST}$  and  $\pi$  at varying levels of sequence divergence ( $d_{xy}$ ).

## Bonus Haiku!

---

Peaks and troughs of  $\pi$ ,  
Static, yet ever-changing.  
Their reflection grows.

---
